1 **Three Isoforms of the Essential Translation Initiation Factor IF2**

2 **Differentially Modulate Homologous Recombination in *Escherichia coli***

3

4 Jillella Mallikarjun<sup>1,2,3</sup>, L SaiSree<sup>4</sup>, P Himabindu<sup>1</sup>, K Anupama<sup>1</sup>, Manjula

5 Reddy<sup>4</sup>, and J Gowrishankar<sup>1,3\*</sup>

6

7 <sup>1</sup>Centre for DNA Fingerprinting and Diagnostics, Hyderabad 500039, India.

8 <sup>2</sup>Graduate Studies, Manipal Academy of Higher Education, Manipal 576104,

9 India.

10 <sup>3</sup>Indian Institute of Science Education and Research Mohali, SAS Nagar 140306,

11 India.

12 <sup>4</sup>CSIR-Centre for Cellular and Molecular Biology, Hyderabad 500007, India.

13

14 \* To whom correspondence should be addressed: Prof J Gowrishankar (Orcid ID:

15 0000-0003-2483-9209), Tel: +91-172-2240266; Fax: +91-172-2240124; Email:

16 shankar@iisermohali.ac.in

17

18

## Abstract

19        In *Escherichia coli*, three isoforms of the essential translation initiation  
20 factor IF2 (IF2-1, IF2-2, and IF2-3) are generated from separate in-frame  
21 initiation codons in *infB*. The isoforms have earlier been suggested to act  
22 differentially in DNA replication restart. We report that in synthetic lethal  
23 situations associated with trapped Holliday junctions caused by deficiency of  
24 enzymes RuvAB or RuvC (that act in the post-synaptic step of homologous  
25 recombination [HR]), viability is restored in absence of any of the following: (i)  
26 IF2-1, (ii) RecA, which is the central protein for synapsis in HR, or (iii) proteins  
27 of the RecFORQ pre-synaptic HR pathway; conversely, loss of IF2-2 and IF2-3  
28 exacerbated the synthetic defect. Strains lacking IF2-1 were also profoundly  
29 sensitive to two-ended DNA double-strand breaks (whose repair is mediated by  
30 RecA through the RecBCD pre-synaptic HR pathway), which was accompanied  
31 by reduction in extent of DNA loss around a break site. In HR assays, recovery  
32 of recombinants was diminished in IF2-1's absence. Our results suggest that  
33 isoforms IF2-1 and IF2-2/3 exert opposite effects at a step downstream of the  
34 two pre-synaptic pathways and of RecA nucleoprotein assembly, so as to  
35 increase and decrease, respectively, the efficiency of synapsis during HR.

36

## Introduction

37 Genetically first identified as a mechanism to mediate exchange of  
38 hereditary determinants between cells (1), the process of homologous  
39 recombination (HR) in bacteria has also been recognized to play a crucially  
40 important role in maintenance of genomic integrity both during chromosomal  
41 replication and following DNA damage, just as is the case in archaea and  
42 eukaryotes [reviewed in (2–11)]. In *Escherichia coli*, protein RecA is central to the  
43 synaptic step of HR: RecA binds a suitable single-strand (ss)-DNA substrate to  
44 form a nucleoprotein filament that performs a homology search to enable  
45 annealing to a second suitable DNA molecule. This synaptic step is flanked by  
46 pre-synaptic and post-synaptic reactions, as described below.

47 The pre-synaptic reactions are designed to generate the ss-DNA substrate  
48 for RecA's binding. Two alternative pre-synaptic pathways RecBCD and RecFOR  
49 (named after the principal proteins mediating them) exist to prepare substrates  
50 from, respectively, double-strand breaks (DSBs) and ss-gaps in DNA. During  
51 DSB repair, RecBCD's exonuclease V (but not helicase) activity is modulated by  
52 cis site(s) in DNA designated Chi, which is an asymmetric 8-bp sequence. Loss  
53 of either RecBCD or RecFOR pathway alone affects certain categories of DNA  
54 recombination and repair, whereas combined loss of both pathways confers a  
55 deficiency as severe as that with loss of RecA itself (3, 8).

56 The presence of RecA-bound nucleoprotein serves also as a trigger for an  
57 SOS response within the cell, by which several prophages are induced to enter  
58 lytic growth and genes of the LexA-repressed SOS regulon are transcriptionally  
59 activated. For the SOS response, RecA's co-protease activity is stimulated  
60 following nucleoprotein assembly to facilitate auto-cleavage of LexA and  
61 prophage repressors [reviewed in (12)].

62 The post-synaptic reactions act to generate discrete recombinant DNA  
63 molecules following annealing of the DNA molecules and formation of Holliday  
64 junctions. The RuvAB helicase and RuvC resolvase are primary mediators at this  
65 step, which catalyze branch migration and resolution of Holliday junctions,  
66 respectively (3).

67           Included in the post-synaptic phase of HR are steps of replication restart,  
68 by which products generated after resolution of Holliday junctions are  
69 assimilated into the circular bacterial chromosome (or plasmid). Proteins  
70 mediating replication restart include PriABC, DnaT, and Rep, which are  
71 proposed to act through several alternative and redundant pathways that are  
72 designated as PriA-PriB, PriA-PriC, and Rep-PriC pathways; the  $\Delta priB$  and  
73 *priA300* mutations have been suggested to specifically abrogate the PriA-PriB  
74 and PriA-PriC pathways, respectively [reviewed in (13–17)].

75           Studies of the past fifteen years from the Nakai group have identified an  
76 intriguing connection between translation initiation factor IF2 on the one hand  
77 and DNA transactions including DNA damage repair on the other (18–20). IF2 is  
78 a GTPase that participates in assembly of the 70S ribosome from its 30S and  
79 50S subunits, in presence of mRNA, fMet-initiator tRNA and two other initiation  
80 factors IF1 and IF3, to initiate translation (21). It is essential for *E. coli* viability,  
81 and its function in translation initiation is conserved across bacteria, archaea,  
82 and eukaryotes (22, 23); a mammalian mitochondrial IF2 homolog can restore  
83 viability to an *E. coli* IF2 knockout strain (24). Three IF2 isoforms are synthesized  
84 in *E. coli* (see Supp. Fig. S2A), from in-frame initiation codons at positions 1, 158,  
85 and 165 of the 890-codon-long *infB* ORF, that are herein designated as IF2-1,  
86 IF2-2 and IF2-3, respectively (25, 26). All isoforms are active for translation  
87 initiation and any one of them is sufficient for viability, since even a polypeptide  
88 with an artificial truncation of the N-terminal 388 amino acids of IF2 is able to  
89 support bacterial growth (27). Nevertheless, there is evidence that isoforms IF2-  
90 1 and IF2-2,3 (the latter designation is used for the mixture of IF2-2 and IF2-3,  
91 since they are only marginally different from one another) are together required  
92 for optimal growth of *E. coli* (28).

93           The Nakai lab has shown that IF2-1 and IF2-2,3 isoforms behave  
94 differently in vitro in assays for phage Mu transposition, and that they confer  
95 differential tolerance in vivo to genotoxic agents. They have proposed that the  
96 isoforms exert varying influences on different pathways of replication restart (18–

97 20). Relevant in this context is a report that IF2 is able to bind DNA through its  
98 C-terminal domain (29).

99 In this study, we have confirmed findings of the Nakai group (19, 20) that  
100 IF2-1 and IF2-2,3 isoforms are associated with differential effects on DNA  
101 damage repair. At the same time, our results indicate that these differential  
102 effects are exerted at an intermediate step in HR, which is downstream of both  
103 RecBCD and RecFOR pre-synaptic pathways and upstream of the post-synaptic  
104 steps of RuvABC action. In particular, we propose that it is the efficiency of RecA-  
105 mediated synapsis between a pair of DNA substrates that is diminished in  
106 absence of IF2-1.

## 107 **Materials and Methods**

108 **Growth media, bacterial strains and plasmids.** The routine rich and defined  
109 growth media were, respectively, LB and minimal A with 0.2% glucose (Glu) (30)  
110 and, unless otherwise indicated, the growth temperature was 37°.   
111 Supplementation with Xgal and with antibiotics ampicillin (Amp),  
112 chloramphenicol (Cm), kanamycin (Kan), spectinomycin (Sp), tetracycline (Tet),  
113 and trimethoprim (Tp) were at the concentrations described earlier (31). For  
114 induction of gene expression from the appropriate regulated promoters, L-  
115 arabinose (Ara), doxycycline (Dox), and isopropyl- $\beta$ -D-thiogalactoside (IPTG)  
116 were added at 0.2%, 50 ng/ml, and 0.5 mM, respectively. Genotoxic agents were  
117 added at concentrations as indicated. *E. coli* strains used are listed in  
118 Supplementary Table S1, with the following knockout (Kan<sup>R</sup> insertion-deletion)  
119 alleles sourced from the collection of Baba et al. (32): *dinF*, *dksA*, *greA*, *ilvA*, *leuA*,  
120 *leuD*, *racC*, *recA*, *recB*, *recO*, *recQ*, *recR*, *ruvA*, *serA*, *thrA*, *uvrD*, *ybfP*, and *yihF*;  
121 the  $\Delta$ *infB* knockout mutation has also been described earlier (24).

122 Plasmids described earlier include pBR322 (Tet<sup>R</sup> Amp<sup>R</sup>, ColE1 replicon)  
123 (33); pACYC184 (Tet<sup>R</sup> Cm<sup>R</sup>, p15A replicon) (34); pCL1920 (Sp<sup>R</sup>, pSC101 replicon)  
124 (35); pMU575 (Tp<sup>R</sup>, single-copy-number vector with *lacZ*<sup>+</sup>) (36); pHYD2411 (Tp<sup>R</sup>,  
125 pMU575 derivative with *rho*<sup>+</sup>) (37); and pTrc99A (Amp<sup>R</sup>, for IPTG-inducible  
126 expression of gene of interest) (38). Plasmids pKD13 (Kan<sup>R</sup> Amp<sup>R</sup>), pKD46 (Amp<sup>R</sup>),

127 and pCP20 (Cm<sup>R</sup> Amp<sup>R</sup>), for use in recombineering experiments and for Flp-  
128 mediated site-specific excision of FRT-flanked DNA segments, have been  
129 described by Datsenko and Wanner (39). Plasmids constructed in this study are  
130 described in the *Supplementary Text*.

131 **Copy number analysis by deep sequencing after I-SceI cleavage.** All cultures  
132 were grown in LB, and strains employed each carried an I-SceI site in *lacZ* and  
133 an Ara-inducible gene construct for I-SceI enzyme. Two alternative protocols  
134 were adopted to achieve I-SceI cleavage: Ara was added to a culture in early  
135 exponential phase and cells were then harvested after 60 min (40), or cultures  
136 were grown to mid-exponential phase in continuous presence of Ara. For each of  
137 the derivatives, a culture grown to mid-exponential phase in LB supplemented  
138 with Glu was used as the common (uninduced) control for either protocol. Copy  
139 number determinations of the various chromosomal regions were performed by  
140 a whole-genome sequencing (WGS) approach, essentially as described (41). Total  
141 DNA was extracted by the phenol-chloroform method, and paired-end deep  
142 sequencing was performed on an Illumina platform to achieve around 60- to 500-  
143 fold coverage for the different preparations. After alignment of sequence reads to  
144 the MG1655 reference sequence (Accession number NC\_000913.3), gross read  
145 counts for non-overlapping 1-kb intervals were normalized to read counts per kb  
146 for a 600-kb region between genome co-ordinates 2501 and 3100 kb (which,  
147 relative to *oriC*, is “antipodal” to the region around *lacZ* on the opposite  
148 replichore, and is therefore expected to be the least affected following cleavage  
149 by I-SceI at *lacZ*). The moving average method for data smoothening was as  
150 described (41).

151 **Other methods.** Procedures were as described for P1 transduction (42),  $\beta$ -  
152 galactosidase assays (30), recombineering on the chromosome or plasmids (39),  
153 R-loop detection with S9.6 monoclonal antibody (43), and SbcCD-mediated  
154 cleavage of a palindromic site engineered in *lacZ* (44, 45). Protocols of Sambrook  
155 and Russell (46) were followed for recombinant DNA manipulations, PCR, and  
156 transformation. The Western blotting procedure, with rabbit polyclonal anti-IF2

157 or anti-Rho antisera (kind gifts from Umesh Varshney and Ranjan Sen,  
158 respectively), was essentially as described (47). Chromosomal integration, at the  
159 phage  $\lambda$  *att* site, of pTrc99A derivatives expressing IF2-2,3 or IF2-3, was achieved  
160 by the method of Boyd et al. (48). HR assay methods are described in the  
161 *Supplementary Text*, and include those based on conjugation (30), the Konrad  
162 assay (49), and inter-plasmid recombination (50, 51). Procedures for flow  
163 cytometric quantitation of dead cells by propidium iodide staining (52) are also  
164 described in the *Supplementary Text*.

165 **Nomenclature for *infB* alleles.** In the descriptions below, the designations *infB*<sup>+</sup>  
166 and  $\Delta infB$  are used for the wild-type and deletion alleles, respectively, at the  
167 native chromosomal location. Nakai and coworkers (19, 20) have described the  
168 following set of three ectopic *infB* chromosomal constructs (designation used in  
169 this study for each of them given in parentheses): that encodes only IF2-1, but  
170 not IF2-2 or IF2-3 ( $\Delta 2,3$ ); that encodes both IF2-2 and IF2-3, but not IF2-1 ( $\Delta 1$ );  
171 and that encodes all three isoforms ( $\Delta Nil$ ). The following  $P_{trc}$ -*infB* constructs were  
172 prepared in this work (designation used for each given in parentheses): that  
173 expresses both IF2-2 and IF2-3, but not IF2-1 ( $P_{trc}\text{-}\Delta 1$ ); and that expresses IF2-  
174 3 alone ( $P_{trc}\text{-}\Delta 1,2$ ).

## 175 **Results**

### 176 **The genetic assays to identify lethality of mutants and their suppression.**

177 The genetic (blue-white) assay to demonstrate lethality has been described  
178 earlier (31, 37, 41). This method makes use of a single-copy-number-shelter  
179 plasmid encoding  $Tp^R$  and carrying *lacZ*<sup>+</sup> as well as a functional copy of the  
180 gene(s) of interest, and whose partitioning into daughter cells during cell division  
181 is not stringently regulated. Consequently, when a strain with this plasmid,  
182 along with  $\Delta lac$  and a mutation in the gene of interest on the chromosome, is  
183 grown in medium not supplemented with  $Tp$ , plasmid-free cells that arise  
184 spontaneously in the culture (at around 5 to 20%) will be able to grow as white  
185 colonies on Xgal-supplemented plates if and only if the now unsheltered

186 chromosomal mutation is not lethal; on the other hand, control blue colonies  
187 (formed from cells retaining the shelter plasmid) would be observed as a majority  
188 in all situations. In the studies below, we have employed the blue-white assay  
189 with a shelter plasmid carrying either *rho*<sup>+</sup> or both *rho*<sup>+</sup> and *infB*<sup>+</sup> genes to  
190 examine lethality or synthetic lethality of *rho*, *rho-ruv*, and *infB* genes.

191 ***rho-ruv* is synthetically lethal, suppressed by loss of IF2-1.** Rho is an  
192 essential protein in *E. coli* that mediates the termination of transcripts (other  
193 than rRNAs and tRNAs) which are not being simultaneously translated (37, 43,  
194 53–56). Rho's function has been implicated in avoidance of RNA-DNA hybrids or  
195 R-loops (37, 43, 55, 57, 58), and maintenance of genomic integrity (59). A *rho*  
196 mutant was obtained with an *opal* (TGA) chain-terminating missense  
197 substitution in codon 136, which is viable in strains carrying the *E. coli* K-12  
198 version of the *prfB* gene encoding release factor 2 (RF2) but not in those carrying  
199 the *E. coli* B version (Supp. Fig. S1A i-ii); there is evidence that the former but  
200 not the latter permits a low frequency of stop codon-readthrough (60). This was  
201 validated by Western blot analysis, which showed, for the *rho-136<sup>opal</sup>* mutant,  
202 bands corresponding to both full-length (faint) and truncated Rho polypeptides  
203 (Supp. Fig. S1B). Another viable *opal* mutant in codon 157 of *rho* has been  
204 reported recently in *E. coli* K-12 (61).

205 The *rho-136<sup>opal</sup>* mutation was synthetically lethal (on both rich and defined  
206 media) with disruptions of the *ruv* genes ( $\Delta ruvA$ ,  $\Delta ruvC$ , or  $\Delta ruvABC$ ) encoding  
207 the Holliday junction enzymes RuvAB or RuvC (see, for example, Fig. 1A ii, and  
208 Supp. Figs. S3A i and S3B i). This *rho* mutation was not synthetic lethal with  
209 disruption of *recA* (Supp. Fig. S1A iii). One suppressor of *rho-ruv* lethality on both  
210 defined and rich media (Fig. 1A iii, and Supp. Fig. S3A ii) was mapped to the  
211 *infB-nusA* locus, and was shown by DNA sequencing to be an *ochre* (TAA)  
212 nonsense codon mutation at position 161 of the *infB* ORF. One would expect,  
213 from its location in the *infB* ORF, that this mutation abrogates synthesis of the  
214 IF2-1 and IF2-2 isoforms, which was confirmed by Western blotting (Supp. Fig.  
215 S2C, lane 6).



216 By itself, the *infB*-161<sup>ochre</sup> mutation was lethal (Supp. Fig. S2B i) but it  
217 could be rescued by *rho* mutation (Supp. Fig. S2B ii). We interpret these findings  
218 as indicative of the notions (i) that nonsense substitution at codon 161 in *infB*  
219 induces Rho-mediated premature transcription termination within the gene, and  
220 therefore (ii) that synthesis of the lone IF2-3 isoform to ensure viability is itself  
221 contingent on relief of transcriptional polarity conferred by *rho* mutation.

222 Thus, viability of a triple mutant *rho ruv infB*-161<sup>ochre</sup> is based on mutual  
223 suppression (i) of *infB*-161<sup>ochre</sup> lethality by *rho*, and (ii) of *rho ruv* lethality by *infB*-  
224 161<sup>ochre</sup>. This inference was supported by findings from experiments in which  
225 expression of an ectopically located *rho*<sup>+</sup> gene was placed under control of an  
226 Ara-inducible promoter (31) (Fig. 1B): that a *rho-ruv* derivative (row 3) is viable  
227 only on Ara-supplemented medium, whereas an *infB*-161<sup>ochre-*rho* mutant (row 2)  
228 as well as the triple mutant *infB*-161<sup>ochre-*rho-ruv* (row 4) are viable only on  
229 medium not supplemented with Ara. The *infB-*rho** mutant was inhibited for  
230 growth at 22° (Supp. Fig. S2D), consistent with the known requirement for IF2  
231 at low temperatures (62).</sup></sup>

232 Based on the suppressor characterization results above, we tested two  
233 other sets of ectopic chromosomal *infB* constructs for their ability to rescue *rho*-  
234 *ruv* lethality, in derivatives carrying a deletion of the native *infB* locus. In one set  
235 of the ectopic constructs, which has been described earlier by Nakai and  
236 colleagues (19), IF2 expression remains under control of the natural *cis*  
237 regulatory elements for *infB* but not all isoforms are expressed from the different  
238 constructs (see Section on “Nomenclature for *infB* alleles” above; and see Supp.  
239 Fig. S2C, lanes 2 to 5 and lane 9 for correlations in Western blot analysis). Our  
240 results showed that the  $\Delta 1$  construct, but not  $\Delta 2,3$  or  $\Delta Nil$ , could suppress *rho*-  
241 *ruv* synthetic lethality (Fig. 1A, compare vi with iv-v). This finding is consistent  
242 with that of *rho-ruv* suppression by *infB*-161<sup>ochre</sup>, since the latter also fails to  
243 express isoform IF2-1.

244 The second set of ectopic chromosomal constructs  $P_{trc}\text{-}\Delta 1$  and  $P_{trc}\text{-}\Delta 1,2$

245 (prepared in this study) were designed for differential expression of IF-2 isoforms  
246 from an IPTG-inducible heterologous  $P_{trc}$  promoter (see Supp. Fig. S2C, lanes 7-  
247 8, respectively, for Western blot confirmation). Both constructs could suppress  
248 *rho-ruv* lethality (Fig. 1A vii and Supp. Fig. S3B ii-iii), indicating once again that  
249 lethality suppression occurs when isoform IF2-1 is absent from the cells. Similar  
250 results were obtained irrespective of which *ruv* mutation ( $\Delta ruvA$ ,  $\Delta ruvC$ , or  
251  $\Delta ruvABC$ ) was used in the experiments (Fig. 1A iii, vi, vii; Supp. Fig. S3A, ii, v;  
252 and Supp. Fig. S3B ii-iii). With induced IF2-3 expression from the IPTG-regulated  
253 construct, suppression was obtained even in derivatives carrying the native *infB*<sup>+</sup>  
254 locus, but the colony growth was less robust (Fig. 1A viii).

255 These results indicate that it is an imbalance between levels of isoforms  
256 IF2-1 (low) and IF2-2,3 (high) that determines suppression of *rho-ruv* lethality.  
257 Loss of IF2-1 did not reverse the phenotypes associated with *rho* mutation (57),  
258 such as a Gal<sup>+</sup> phenotype that follows relief of premature transcription  
259 termination in the *gal* operon caused by *galEp3* mutation (Supp. Fig. S1C,  
260 compare iii-iv with ii), or lethality caused by runaway replication of plasmid  
261 pACYC184 (Supp. Fig. S1A iv-vi). Deficiency of IF2-1 did not also reverse UV-  
262 sensitivity known for *ruv* mutants (3, 63), and indeed it aggravated the phenotype  
263 (Supp. Fig. S2E). Thus, suppression of *rho-ruv* lethality by absence of IF2-1 is  
264 not because of restoration (or bypass) of Rho or Ruv function in these strains.

265 **Loss of IF2-2,3 exacerbates *rho-ruv* defect.** We expected that derivatives with  
266 the missense *rho-4* mutation (encoding Rho-A243E (57), see Supp. Fig. S1B lane  
267 2 for Western blot) would be less compromised for Rho function than those with  
268 *rho-136<sup>opal</sup>*, and a test for intracellular R-loop prevalence with monoclonal  
269 antibody S9.6 (43, 64) showed this to be so (Supp. Fig. S1D). Unlike *rho-136<sup>opal</sup>*,  
270 the *rho-4* mutation was not synthetically lethal with *ruv* in the Nakai  $\Delta Nil$  strain  
271 expressing all three IF2 isoforms (Fig. 1A ix). However, this combination (*rho-4*  
272 *ruv*) conferred lethality in the  $\Delta_{2,3}$  derivative (lacking IF2-2,3) (Fig. 1A x), and  
273 this lethality was rescued by IPTG-induced expression of IF2-2,3 (Fig. 1A xi).  
274 Thus, absence of IF2-1 and of IF2-2,3 exert the apparently opposite phenotypes

275 of, respectively, alleviating and exacerbating the RecFORQ- and RecA-mediated  
276 sickness of *rho-ruv* mutants.

277 **Loss of RecA, or of RecFOR pathway components, suppress *rho-ruv***  
278 **lethality.** Synthetic *rho-ruv* lethality was suppressed by the *rpoB\*35* mutation  
279 (65–67) (Supp. Fig. S3A vii), as also by ectopic expression of the (phage T4-  
280 encoded) R-loop helicase UvsW but not its active site mutant version UvsW-  
281 K141R (68, 69) (Supp. Fig. S3A viii-ix). Both *rpoB\*35* and UvsW alleviate the  
282 deleterious effects of Rho deficiency and can rescue  $\Delta\rho$  lethality (37, 43, 59).  
283 *rho-ruv* lethality was also rescued by  $\Delta recA$  (Fig. 1C i, and Supp. Fig. S3A vi),  
284 raising the possibility that excessive (and unnecessary) HR triggered in presence  
285 of the *rho* mutation was leading to accumulation of Holliday junction  
286 intermediates in absence of RuvABC, resulting in cell death. The alternative  
287 explanation, that death was on account of excessive RecA-dependent SOS  
288 induction in *rho-ruv* mutants, was excluded since lethality was not rescued by  
289 the *lexA3* mutation [which encodes a LexA variant that is non-cleavable by RecA,  
290 and hence also abolishes SOS induction (12)] (Fig. 1C vi).

291 We then tested which of the two pre-synaptic pathways putatively feeds  
292 into the process of excessive HR in *rho-ruv* mutants. The synthetic lethality was  
293 suppressed by mutations in *recO* or *recR* (of the RecFOR pathway) (Fig. 1C ii-iii),  
294 but not by mutation in *recB* (of the RecBC pathway) (Fig. 1C iv). RecQ helicase  
295 activity is implicated in RecFOR pathway function (3, 8), and  $\Delta recQ$  also was a  
296 suppressor of *rho-ruv* lethality (Fig. 1C v).

297 **Synthetic lethality of *uvrD-ruv* is suppressed by loss of IF2-1.** Several groups  
298 have earlier reported synthetic *uvrD-ruv* lethality (70–72), which is suppressed  
299 by *recA* and *recFORQ* but not *recBC* (that is, very similar to our findings with *rho-ruv*  
300 lethality). The mechanism invoked has been that of excessive and  
301 unnecessary HR in the *uvrD* mutant, leading to accumulation of toxic  
302 recombination intermediates in absence of RuvABC.

303 To test whether IF2 isoforms affect *uvrD-ruv* lethality, we expressed (from

304 a Dox-inducible promoter) a dominant-negative RuvC protein designated as  
305 RDG, that binds and traps Holliday junctions (63); these experiments were done  
306 in a set of  $\Delta uvrD \Delta infB$  derivatives each carrying one of the ectopically integrated  
307 Nakai constructs for different IF2 isoforms. Viability of the  $\Delta Nil$  and  $\Delta 2,3$  strain  
308 derivatives was reduced  $10^3$ - and  $10^4$ -fold, respectively, upon Dox addition  
309 whereas the  $\Delta 1$  derivative was only minimally affected (Fig. 1D). A *recA* derivative  
310 of the  $\Delta Nil$  strain survived Dox, as too did the control *uvrD*<sup>+</sup> *recA*<sup>+</sup> strain (Fig. 1D,  
311 last and first rows, respectively). These results confirm that *uvrD-ruv* is  
312 synthetically lethal (more severely so in absence of IF2-2,3), and that this  
313 lethality is rescued upon loss of RecA or of IF2-1.

314 **Loss of IF2-1 confers profound sensitivity to two-ended DSBs in DNA.** The  
315 Nakai group (19, 20) had shown previously that the  $\Delta 1$  strain expressing just the  
316 IF2-2,3 isoforms is sensitive to genotoxic agents such as methyl  
317 methanesulphonate or nitrofurazone, whereas the  $\Delta Nil$  and  $\Delta 2,3$  strains are  
318 tolerant. In dilution-spotting assays, we confirmed the Nakai results for methyl  
319 methanesulphonate (Supp. Fig. S4A), and additionally found that the  $\Delta 1$  strain  
320 is profoundly sensitive to radiomimetic agents phleomycin (Phleo) or bleomycin  
321 (Bleo). Thus, at concentrations of Phleo or Bleo that provoke chromosomal two-  
322 ended DSBs (and so render a *recA* mutant inviable), the strain lacking IF2-1 was  
323 killed to at least the same extent as *recA* itself (Fig. 2A). On the other hand, the  
324  $\Delta 2,3$ , *priA300* or  $\Delta priB$  strains were as tolerant to these agents as was the  $\Delta Nil$   
325 strain (Fig. 2A). Phleo sensitivity of the  $\Delta 1$  strain could be complemented by  
326 plasmid-borne *infB*<sup>+</sup> (Supp. Fig. S4B). The  $\Delta 1$  strain (but not  $\Delta Nil$  or  $\Delta 2,3$ ), and a  
327 *recA* derivative of  $\Delta Nil$ , were also markedly sensitive to two-ended DSBs  
328 generated by endonuclease I-SceI (Fig. 2B).

329 Sensitivity of the  $\Delta 1$  derivatives to Phleo or to I-SceI cleavage was  
330 demonstrated also by flow cytometry following propidium iodide staining for dead  
331 cells in cultures, wherein these strains exhibited much greater cell death than  
332 did the isogenic  $\Delta Nil$  or  $\Delta 2,3$  strains (Fig. 2C, middle and bottom rows). Even in  
333 ordinarily grown cultures without any DNA damaging agent or treatment, around

334 8% of cells of the  $\Delta 1$  strain were scored as dead, a value comparable to that for  
335 *recA* and much higher than those for  $\Delta Nil$  or  $\Delta 2,3$  derivatives (< 0.5% each) (Fig.  
336 2C, top row); it should be noted, however, that these values do not take into  
337 account any contributions to inviability by anucleate cells or cell lysis in the  
338 cultures (73, 74).

339 It is the RecBCD pre-synaptic pathway that is involved in RecA-mediated  
340 recombinational repair of two-ended DSBs in DNA (3, 5–8), which was confirmed  
341 also in our experiments, by demonstrating that a *recB* but not *recO* mutant is  
342 sensitive to Phleo and Bleo (Supp. Fig. S4C). These results therefore establish  
343 that loss of IF2-1 is associated with compromise of two-ended DSB repair  
344 mediated by RecA and the RecBCD pre-synaptic pathway.

345 The results above were with perturbations generating two-ended DSBs in  
346 the genome. Interestingly, with lower concentrations of Phleo or Bleo wherein  
347 *recA* viability was only marginally affected, the strain without IF2-1 continued to  
348 exhibit marked sensitivity (Supp. Fig. S4D, compare rows 4 and 7 of three panels  
349 at left; supported also by data in Bleo sub-panel of Fig. 2A). This would suggest  
350 that at the low doses, DNA damage other than DSBs continues to occur (perhaps  
351 ss-DNA gaps), which can be repaired by RecA-independent mechanism(s) [such  
352 as by DNA polymerase I followed by DNA ligase (3)] but only so if IF2-1 is present.

353 On the other hand, the effect of IF2-1 loss on tolerance to some other  
354 perturbations or genotoxic agents that are also expected to generate DSBs was  
355 much less severe. Thus, type-2 DNA topoisomerase inhibitors nalidixic acid and  
356 ciprofloxacin were tolerated to equivalent extents by the strains with differential  
357 expression of the IF2 isoforms, but conferred  $10^3$ -fold greater lethality upon loss  
358 of RecA or of PriB (Supp. Fig. S4A; see also Supp. Fig. S4C for sensitivity to  
359 ciprofloxacin of a *recB* but not *recO* mutant). The reversal in rank order of  
360 sensitivity between  $\Delta priB$  and  $\Delta 1$  strains, to type-2 DNA topoisomerase inhibitors  
361 on the one hand and (high-dose) radiomimetic agents on the other, suggests that  
362 repair mechanisms following exposure to these two agent categories are distinct

363 and different, although both are RecA- and RecBCD-mediated (3, 75).

364         Again unlike a *recA* derivative, the  $\Delta 1$  strain was not sensitive to mitomycin  
365 C (Supp. Fig. S4A), nor was it killed upon DSB generation at a palindromic locus  
366 of a sister chromatid during DNA replication (44, 45) (Supp. Fig. S4E). The Nakai  
367 group (19) had previously shown that the  $\Delta 1$  strain is not sensitive to UV, which  
368 we have also confirmed (Supp. Fig. S2E, row 2).

369 **Role of IF2 isoforms in two-ended DSB repair is independent of GreA/DksA.**

370 Loss of GreA (which binds within the secondary channel of RNA polymerase and  
371 restores it from a backtracked state during transcription elongation) is  
372 associated with increased tolerance to DSBs in DNA (40, 66, 67), which was  
373 confirmed for Phleo in this study (Supp. Fig. S4D, panel for 3  $\mu\text{g}/\text{ml}$ ). DksA is  
374 an apparent competitor to GreA with respect both to DSB repair (40, 66, 67) and  
375 to other phenomena (76, 77), and its loss conferred a modest sensitivity to Phleo  
376 (Supp. Fig. S4D, panels for 0.25 and 1  $\mu\text{g}/\text{ml}$ ).

377         Our results further show that sensitivity to Phleo of a strain lacking IF2-1  
378 is reversed, but only partially so, upon loss of GreA and that it is somewhat  
379 exacerbated upon loss of DksA (Supp. Fig. S4D, panel for 0.25  $\mu\text{g}/\text{ml}$ ); thus the  
380 opposing effects of the two losses (IF2-1 and GreA) appear to be algebraically  
381 additive. These results suggest that the mechanism by which IF2-1 isoforms  
382 modulate DSB repair is different from that by GreA/DksA.

383 **Genome-wide DNA copy number analysis following site-specific generation**

384 **of a two-ended DSB.** The Herman lab (40) has previously shown by WGS that  
385 following induction of synthesis of I-SceI to generate a two-ended DSB at a single  
386 genomic location in the *lac* operon, an equilibrium between DNA resection and  
387 re-synthesis is reached by 30 minutes wherein there is a Chi-site modulated,  
388 asymmetric V-shaped dip in DNA copy number extending from  $\sim 100$  kb *ori*-  
389 proximal to  $\sim 200$  kb *ori*-distal of the DSB site. The *recA* mutant, on the other  
390 hand, exhibits extensive (“reckless”) DNA degradation.

391 We performed similar WGS experiments to determine genome-wide DNA  
392 copy numbers in LB-grown cultures for strains carrying an I-SceI site at the *lacZ*  
393 locus, and in which the cognate enzyme had been induced in early exponential  
394 phase for one hour (by addition of the inducer Ara); Glu was used instead of Ara  
395 in the control uninduced cultures. The strains carried the ectopic Nakai *infB*  
396 constructs ( $\Delta Nil$ ,  $\Delta 1$ , or  $\Delta 2,3$ ) and were  $\Delta infB$  at its native locus, and a *recA*  
397 derivative of the  $\Delta Nil$  strain was also used (designated *recA* below).

398 Normalized copy number distributions from the cultures were determined  
399 as described above, and all of them exhibited a bidirectional *oriC*-to-*Ter* gradient  
400 that is expected for cells in asynchronous exponential growth in rich medium  
401 (Fig. 3). Superimposed upon this gradient distribution were several distinct  
402 features of interest, that are discussed separately below.

403 Following I-SceI induction with Ara, the  $\Delta Nil$  strain and its *recA* derivative  
404 exhibited, respectively, the asymmetric V-shaped *Ter*-biased dip around *lacZ*  
405 (Fig. 3 v, and Supp. Fig. S5B i) and a very extensive degradation (Fig. 3 viii) as  
406 had previously been reported by the Herman group (40). The *recA* mutant also  
407 showed a small dip in *lacZ* region read counts in the Glu-grown culture (Fig. 3 iv  
408 and Supp. Fig. S5B, compare iv and v), suggestive of I-SceI cleavage in a minor  
409 proportion of cells even under uninduced conditions which is likely efficiently  
410 repaired in the IF2-1,2,3 strain but is lethal in *recA*.

411 Following 1-hr exposure to Ara, the  $\Delta 2,3$  strain behaved similarly to  $\Delta Nil$   
412 for copy number changes around *lacZ* (Fig. 3 vi and Supp. Fig. S5B ii), whereas  
413 the  $\Delta 1$  strain exhibited only a very minimal dip in read counts at this region (Fig.  
414 3 vii and Supp. Fig. S5B iii). The latter finding was unexpected, since it was  
415 opposite to that in *recA* with which  $\Delta 1$  shares the phenotype of pronounced  
416 sensitivity to two-ended DSBs (including cleavage by I-SceI). The observation was  
417 reproducible, in that the  $\Delta 1$  strain cultured continuously with Ara also showed  
418 less or no dip in read counts around *lacZ* compared to that in the  $\Delta Nil$  strain  
419 similarly cultured (Supp. Figs. S5A and S5B, compare, respectively, sub-panels

420 i with ii and vi with vii). Furthermore, we verified that the proportion of  
421 suppressors in the  $\Delta 1$  cultures (that is, survivors after Ara addition) was < 1%,  
422 nor did DNA sequence data for these cultures reveal mutations in any of the  
423 candidate genes related to DNA recombination and repair.

424 In the chromosomal terminus region, there was a peak of read counts  
425 between the *TerA* and *TerC/B* boundaries that was extremely prominent for the  
426 Ara-exposed cultures of  $\Delta Nil$  and moderately so for  $\Delta 2,3$  and  $\Delta 1$  (Fig. 3A v-vii). As  
427 proposed earlier (78), we believe that this mid-terminus peak represents the  
428 algebraic sum of read counts of two major subpopulations, in which,  
429 respectively, clockwise and counterclockwise moving forks have traversed the  
430 terminus and are paused at Tus-bound *TerC/B* and *TerA*.

431 Another feature was the presence of sharp deep dips at several genomic  
432 positions (resembling stalactite images) which were especially pronounced in a  
433 Glu-grown culture of the  $\Delta 1$  strain, and representing  $\log_2$  drops in normalized  
434 read counts of around 3 or more (Fig. 3 iii; and see maroon lines in Supp. Fig.  
435 S5C). Similar dips were observed in copy number curves for Glu-grown cultures  
436 of (in order of their prominence) *recA* and  $\Delta Nil$  (Fig. 3 iv and i, respectively). The  
437 positions of these dips were identical in all three cultures, to a resolution of < 2  
438 kb; five such representative genomic locations are depicted in Supplementary  
439 Figure S5C (green and violet lines for *recA* and  $\Delta Nil$ , respectively). The dips were  
440 present also in Ara-exposed cultures of  $\Delta 1$  (Fig. 3 vii and Supp. Fig. S5A ii), and  
441 to less extent in those of *recA* and  $\Delta Nil$  (Fig. 3 viii and Supp. Fig. S5A i,  
442 respectively). We suggest that this feature is correlated with presence in the  
443 strains of the gene encoding I-SceI, whose basal expression is perhaps associated  
444 with nickase activity (79) at specific sequences which then leads to ss-DNA gaps  
445 at these sites [since such ss-regions are not expected to be captured in Illumina  
446 WGS protocols (40)]. Indeed, dips at several of the identical locations were  
447 observed upon re-analysis of the Herman lab data (40) for uninduced cultures of  
448 wild-type and *recA* strains carrying the I-SceI gene, with those of *recA* being the  
449 more prominent (Supp. Fig. S5A iii-iv; and yellow and dark blue lines,



450 respectively, in Supp. Fig. S5C). Interestingly, the dips were least distinct for a  
451 Glu-grown culture of the  $\Delta_{2,3}$  strain (Fig. 3 ii, and light blue line in Supp. Fig.  
452 S5C); this last observation serves to exclude, as a possible explanation for these  
453 dips, sequence-specific bias in generation of read numbers during WGS.

454 To summarize, whole-genome copy number analysis in different strains  
455 without and with two-ended DSB generation at *lacZ* revealed the following: (i)  
456 after DSB generation, V-shaped dips in read counts around *lacZ* occur in  $\Delta Nil$   
457 and  $\Delta_{2,3}$  strains (more pronounced in former), that is associated also with peaks  
458 in the terminus region; (ii) *recA* exhibits extreme DNA degradation as expected  
459 under these conditions (40); (iii) on the other hand, the reduction of read counts  
460 around *lacZ* in the  $\Delta 1$  strain is minimal; and (iv) there are sharp dips in read  
461 counts at several genomic locations in uninduced cultures of the  $\Delta 1$  strain that  
462 are seen also in *recA* and  $\Delta Nil$  but not so in  $\Delta_{2,3}$ .

463 **HR frequency is oppositely affected by loss of IF2-1 and of IF2-2,3, and is**  
464 **elevated in *rho* mutants.** To test the differential effects, if any, of IF2 isoforms  
465 on recovery of recombinants following HR, we employed several assays such as  
466 those of phage P1 transduction, inter-plasmidic recombination (that leads to  
467 reconstitution of Tet<sup>R</sup> gene from two partially overlapping deletion alleles) (50,  
468 51, 80, 81), and the Konrad assay (that similarly entails reconstitution of an  
469 intact *lacZ* gene from a split pair of partially overlapping *lacZ* fragments located  
470 at distant sites on the chromosome) (49, 82). Recombination events in each of  
471 the assays above are RecA-dependent (3, 49, 50); inter-plasmidic recombination  
472 is mediated by the RecFOR pre-synaptic pathway (50, 80, 81), whereas P1  
473 transduction and recombination in the Konrad assay are RecBCD-dependent  
474 (49).

475 In the HR assays, loss of IF2-1 and of IF2-2,3 were associated with  
476 moderate reduction and elevation, respectively, in recovery of recombinants in  
477 comparison with values for the  $\Delta Nil$  strain (Fig. 4A-C). A moderate reduction in  
478 P1 transduction frequency for the strain lacking IF2-1 has also been reported

479 earlier (19).

480 As expected (49, 82, 83), loss of UvrD conferred a hyper-recombination  
481 phenotype (Fig. 4A-B), but the HR frequency in a derivative that had lost both  
482 UvrD and IF2-1 was once again low and resembled that in a strain lacking IF2-  
483 1 alone (Fig. 4A, compare columns 3 and 6). Thus, loss of IF2-1 is epistatic to  
484  $\Delta uvrD$ , indicating that UvrD's function in HR precedes and is in the same  
485 pathway as that of IF2-1, but that the two act oppositely.

486 Since the results above suggested that loss of IF2-1 is associated with  
487 reduced RecA function in HR (see *Discussion*), we examined whether there is  
488 reduction in SOS induction [which is mediated by RecA's coprotease activity that  
489 is activated upon binding to ss-DNA (12)] as well in this situation. The results  
490 indicate that the basal SOS response, as measured by *sulA-lac* expression (84),  
491 is not decreased and may in fact be modestly elevated in the  $\Delta 1$  strain (Supp.  
492 Fig. S2F).

493 Our finding of *rho-ruv* synthetic lethality that is suppressed by *recA*  
494 suggests, based on its parallels with *uvrD-ruv* lethality, that non-essential HR  
495 occurs at elevated frequency in the *rho-136<sup>opal</sup>* mutant. Measurements of HR  
496 frequency, both by the Konrad assay and by conjugation, indicate that the *rho*  
497 mutant does exhibit a moderate increase in HR frequency (Supp. Fig. S1E).

## 498 **Discussion**

499 The major findings of this study are those of (i) RecA- and RecFORQ-  
500 dependent *rho-ruv* synthetic lethality, and (ii) differential effects of IF2 isoforms  
501 on HR and DNA damage repair, and they are further discussed below.

502 **Why is *rho-ruv* lethal?** Several features are shared between synthetic lethalties  
503 *rho-ruv* and *uvrD-ruv*, suggesting commonality of mechanisms in the two  
504 instances. Thus, both lethalties require proteins RecA, RecFORQ, and  
505 translation initiation factor isoform IF2-1.

506 In case of *uvrD-ruv*, the model proposed by Rosenberg and colleagues (70)  
507 is that in absence of UvrD, there is excessive but unnecessary HR through the  
508 RecFORQ pathway, which then renders RuvABC essential for resolving the  
509 ensuing Holliday junction intermediates. Likewise for the *rho* mutant, we suggest  
510 that on account of an increased prevalence of R-loops with displaced ss-DNA,  
511 increased HR is triggered through the RecFOR pathway thus necessitating  
512 RuvABC's presence for viability; in this model, UvsW expression and *rpoB\*35* are  
513 suppressors of *rho-ruv* lethality because they act to reduce R-loop prevalence in  
514 Rho-deficient strains (37, 43, 59). A recent study has shown that R-loops do  
515 stimulate HR in eukaryotic cells (85).

516 **Opposing effects of IF2-1 and IF2-2,3 isoforms in HR pathways.** Early studies  
517 had established that isoforms IF2-1 and IF2-2,3 are together required for optimal  
518 growth of *E. coli* (28). Nakai and coworkers (19, 20) have reported that loss of  
519 IF2-1 or of IF2-2,3 is each associated with sensitivity to different kinds of DNA  
520 damage.

521 In our study, loss of IF2-1 or of IF2-2,3 was associated with suppression  
522 or aggravation, respectively, of *rho-ruv* and *uvrD-ruv* sickness. The model for  
523 opposing effects of these isoforms is supported also by our findings in HR assays.  
524 At a mechanistic level, it is unclear whether a particular phenotype is caused by  
525 absence of one IF2 isoform or exclusive presence of another. An analogy can be  
526 drawn to the situation with DksA and GreA/B proteins, where too the effects of  
527 the loss of one protein can be mimicked by overexpression of the other (40, 76,  
528 77).

529 **How do IF2 isoforms influence HR and recombinational repair?** Although  
530 our studies have identified IF2 isoforms as novel players in HR and  
531 recombinational repair, the mechanisms by which they act for this purpose are  
532 at present unknown. Loss of isoform IF2-1 phenocopies the partial or complete  
533 loss of RecA for at least four different phenomena: (i) suppression of *rho-ruv* and  
534 *uvrD-ruv* lethalties; (ii) profound sensitivity to two-ended DSBs in DNA provoked

535 by Phleo, Bleo, or I-SceI; (iii) presence of a significant proportion of dead cells in  
536 cultures during ordinary growth; and (iv) reduced recovery of recombinants  
537 following HR. Of these, at least the first and second involve, respectively, the  
538 RecFOR and RecBCD pre-synaptic pathways.

539 At the same time, DNA copy number analysis following I-SceI cleavage at  
540 *lacZ* has revealed that loss of RecA and of IF2-1 have opposite effects of decrease  
541 and increase, respectively, in copy number relative to values in the  $\Delta Nil$  strain.  
542 For the strain lacking IF2-1, these data may point to either increased (“futile”)  
543 repair synthesis or decreased degradation, relative to the parent. For example,  
544 repair synthesis is known to be increased in *recG* (44) or *recD* (45) mutants.  
545 Reduced DNA degradation at DSBs occurs in *greA* mutants (40), but in this case  
546 is correlated with enhanced tolerance to two-ended DSBs. An important  
547 unanswered question is identity of the exonuclease(s) responsible for DNA loss  
548 at a two-ended DSB site; although the degradation is Chi-site modulated in a  
549 wild-type strain, it nevertheless occurs (and indeed is substantially elevated) in  
550 a *recB* mutant lacking both helicase and exonuclease V activities of RecBCD (40).

551 Based on these features, we suggest that absence of IF2-1 leads directly  
552 or indirectly to reduction in efficiency of a step in HR which is (i) downstream of  
553 (and common to) the RecBCD and RecFOR pathways, and (ii) upstream of the  
554 post-synaptic reactions mediated by RuvABC. Formation of the RecA  
555 nucleoprotein is apparently unaffected, since the SOS response (12) is not  
556 perturbed by loss of IF2-1. Deficiency of IF2-2,3 is proposed to have the opposite  
557 effect of enhancing the efficiency of the same step in HR as that diminished by  
558 loss of IF2-1.

559 Thus, one possibility is that in absence of IF2-1, RecA nucleoprotein  
560 bundles are assembled which, however, are non-productive and inefficient in  
561 “homology searching” during the synaptic step of HR (11, 86); this notion is  
562 consistent with our finding that IF2-1's role in HR is downstream to that of UvrD,  
563 which acts to modulate efficiency of RecA nucleoprotein formation on DNA

564 substrates generated by the two alternative pre-synaptic pathways (83, 87). The  
565 RecN protein, which is also required for DSB repair (88, 89), is postulated to act  
566 at a step upstream of RecA-mediated synapsis (90); the epistatic relationship  
567 between IF2 isoforms and RecN remains to be determined.

568 A requirement for homology searching may be more critical for certain  
569 kinds of DNA damage such as two-ended DSBs than it is for others (89), which  
570 could explain why loss of IF2-1 confers more sensitivity, relative to the  $\Delta Nil$   
571 strain, to (high doses of) Phleo or Bleo than it does to mitomycin C or type-2 DNA  
572 topoisomerase inhibitors. Even in other life forms, distinctive mechanisms exist  
573 for two-ended DSB repair (91–95).

574 We further suggest that loss of IF2-1 leads to reduced exonuclease V action  
575 (which is one component of RecBCD function) after DSBs are generated (3, 8,  
576 11), resulting in reduced DNA degradation. Should this postulated second effect  
577 of IF2-1 deficiency be in some way a consequence of the first, it may point to  
578 existence of an interesting phenomenon of retrograde control of RecBCD  
579 nuclease function by the RecA nucleoprotein filament, an idea that has  
580 previously been suggested for *Caulobacter crescentus* (whose RecBCD equivalent  
581 is AddAB) (96). The proposed second effect could also explain why loss of IF2-1  
582 is associated with a log-scale decrease in efficiency of two-ended DSB repair  
583 whereas its effects in the HR assays were more modest.

584 Our model that loss of IF2-1 compromises RecA function is different from  
585 that of Nakai and colleagues (19, 20), who proposed that IF2 isoforms  
586 differentially influence different replication restart pathways (which are post-  
587 synaptic, and downstream of RuvABC action). As explained above, our finding  
588 that loss of IF2-1 phenocopies the *recA* mutation in suppressing *rho-ruv* and  
589 *uvrD-ruv* lethalties can best be explained only by invoking a role for IF2-1 prior  
590 to the step of RuvABC action.

591 The other feature that distinguishes between IF2 isoforms is the set of  
592 sharp dips in copy number read counts that occur at specific genomic locations

593 in strains with the I-SceI gene, even in uninduced cultures. On the assumption  
594 that the dips represent the net prevalence of ss-DNA gaps at these sites in cells  
595 of the population (that is, the balance between their generation and repair), it  
596 would appear that the magnitude of reduction in read counts (which is in the  
597 order  $\Delta 1 > recA > \Delta Nil > \Delta 2,3$ ; Supp. Fig. S5C) inversely reflects the efficiency of  
598 their repair in the different strains. Consistent with this interpretation is our  
599 finding that loss of IF2-1 confers greater sensitivity than that of RecA to low  
600 concentrations of Phleo or Bleo (Supp. Fig. S4C), which may further suggest that  
601 in IF2-1's absence, RecA's non-productive binding to ss-DNA itself interferes with  
602 successful operation of the RecA-independent repair mechanisms.

603 To test the models above, in vitro studies are needed to examine whether  
604 IF2 isoforms act directly to modulate HR, and to determine their precise role(s)  
605 in the process. Regulation of HR and of recombinational repair functions is  
606 important in both prokaryotes and eukaryotes (97, 98), and factors previously  
607 identified for such regulation in *E. coli* include UvrD, mismatch repair proteins,  
608 DinI, and RecX (3, 83, 99–101).

609 Furthermore, IF2 would represent another example, apart from NusA  
610 (102–104) and GreA (40), of a protein earlier characterized for another critical  
611 function also participating in DNA repair. IF2 isoforms exist in other bacteria  
612 such as, for example, in species of the Gram-negative *Salmonella*, *Serratia* and  
613 *Proteus* (23) as well as in Gram-positive *Bacillus subtilis* (105), and their role if  
614 any in modulating HR may also be examined in future studies.

#### 615 **Data availability**

616 The genome sequence and flow cytometry data described in this work are  
617 available for full public access from the repositories at  
618 <http://www.ncbi.nlm.nih.gov/bioproject/734449> and  
619 <https://flowrepository.org/id/FR-FCM-Z442>, respectively.

#### 620 **Supplementary data**

621 Supplementary data are provided in a PDF file “Supplementary data”.

## 622 **Funding**

623 This work was supported by Government of India funds from (i) DBT  
624 Centre of Excellence (COE) project for Microbial Biology – Phase 2, (ii) SERB  
625 project CRG/ 2018/ 000348, and (iii) DBT project BT/ PR34340/ BRB/ 10/  
626 1815/ 2019. JM was recipient of a DST-INSPIRE fellowship, and JG was  
627 recipient of the J C Bose fellowship and INSA Senior Scientist award.

628 We declare that there are no conflicts of interest.

## 629 **Acknowledgements**

630 We thank R Harinarayanan, Hiroshi Nakai, Susan Rosenberg, Ranjan Sen,  
631 and Umesh Varshney for strains, plasmids, and reagents; Sayantan Goswami  
632 for recombineering of the I-SceI site in *lacZ*; Nalini Raghunathan and Apuratha  
633 Pandiyan for assistance with WGS data analysis; Anjana Badrinarayanan,  
634 Rachna Chaba, Dipak Dutta, and Mohan Joshi for comments on the manuscript;  
635 and COE team members for advice and discussions.

636 *Author contributions:* With the exception of the work components listed below, all  
637 experimental contributions in this study were by JM, under supervision of JG.  
638 LS, under supervision of MR, obtained and sequenced the *rho*-136<sup>opal</sup> mutation,  
639 demonstrated *rho*-*ruv* lethality, and obtained and mapped a novel suppressor to  
640 the *nusA-infB* region. PH, under supervision of KA, determined the suppressor  
641 to be *infB*-161<sup>ochre</sup>, performed the experiment for Fig. 1B, and constructed  
642 plasmid pHYD2906. JG drafted the manuscript.

## 643 **References**

- 644 1. Clark,A.J. (1973) Recombination deficient mutants of *E. coli* and other  
645 bacteria. *Annu. Rev. Genet.*, **7**, 67–86.
- 646 2. Kuzminov,A. (1995) Collapse and repair of replication forks in *Escherichia coli*.  
647 *Mol. Microbiol.*, **16**, 373–384.
- 648 3. Kuzminov,A. (1999) Recombinational repair of DNA damage in *Escherichia coli*

- 649 and bacteriophage  $\lambda$ . *Microbiol. Mol. Biol. Rev.*, **63**, 751–813.
- 650 4. Cox,M.M., Goodman,M.F., Kreuzer,K.N., Sherratt,D.J., Sandlerk,S.J. and  
651 Marians,K.J. (2000) The importance of repairing stalled replication forks.  
652 *Nature*, **404**, 37–41.
- 653 5. Sinha,A.K., Possoz,C. and Leach,D.R.F. (2020) The roles of bacterial DNA  
654 double-strand break repair proteins in chromosomal DNA replication. *FEMS*  
655 *Microbiol. Rev.*, **44**, 351–368.
- 656 6. Dermić,D. (2015) Double-strand break repair mechanisms in *Escherichia coli*:  
657 recent insights. *Adv. Genomics Genet.*, **5**, 35-42.
- 658 7. Blackwood,J.K., Rzechorzek,N.J., Bray,S.M., Maman,J.D., Pellegrini,L. and  
659 Robinson,N.P. (2013) End-resection at DNA double-strand breaks in the  
660 three domains of life. *Biochem. Soc. Trans.*, **41**, 314–320.
- 661 8. Kowalczykowski,S.C. (2000) Initiation of genetic recombination and  
662 recombination-dependent replication. *Trends Biochem. Sci.*, **25**, 156–165.
- 663 9. Lenhart,J.S., Schroeder,J.W., Walsh,B.W. and Simmons,L.A. (2012) DNA  
664 repair and genome maintenance in *Bacillus subtilis*. *Microbiol. Mol. Biol. Rev.*,  
665 **76**, 530–564.
- 666 10. Costes,A. and Lambert,S.A.E. (2013) Homologous recombination as a  
667 replication fork escort: Fork-protection and recovery. *Biomolecules*, **3**, 39–  
668 71.
- 669 11. Bianco,P.R. and Lu,Y. (2021) Single-molecule insight into stalled replication  
670 fork rescue in *Escherichia coli*. *Nucleic Acids Res.*, **49**, 4220–4238.
- 671 12. Simmons,L.A., Foti,J.J., Cohen,S.E. and Walker,G.C. (2008) The SOS  
672 Regulatory Network. *EcoSal Plus*, **3**, doi: 10.1128/ecosalplus.5.4.3.
- 673 13. Michel,B., Sinha,A.K. and Leach,D.R.F. (2018) Replication fork breakage and  
674 restart in *Escherichia coli*. *Microbiol. Mol. Biol. Rev.*, **82**, e00013-18.
- 675 14. Gabbai,C.B. and Marians,K.J. (2010) Recruitment to stalled replication forks  
676 of the PriA DNA helicase and replisome-loading activities is essential for  
677 survival. *DNA Repair*, **9**, 202–209.
- 678 15. Michel,B. and Sandler,S.J. (2017) Replication restart in bacteria. *J.*  
679 *Bacteriol.*, **199**, 1–13.
- 680 16. Heller,R.C. and Marians,K.J. (2006) Replisome assembly and the direct  
681 restart of stalled replication forks. *Nat. Rev. Mol. Cell Biol.*, **7**, 932–943.
- 682 17. Huang,Y.H. and Huang,C.Y. (2014) Structural insight into the DNA-binding  
683 mode of the primosomal proteins PriA, PriB, and DnaT. *Biomed Res. Int.*,  
684 <http://dx.doi.org/10.1155/2014/195162>.



- 685 18. North,S.H., Kirtland,S.E. and Nakai,H. (2007) Translation factor IF2 at the  
686 interface of transposition and replication by the PriA-PriC pathway. *Mol.*  
687 *Microbiol.*, **66**, 1566–1578.
- 688 19. Madison,K.E., Abdelmeguid,M.R., Jones-Foster,E.N. and Nakai,H. (2012) A  
689 new role for translation initiation factor 2 in maintaining genome integrity.  
690 *PLoS Genet.*, **8**, e1002648.
- 691 20. Madison,K.E., Jones-Foster,E.N., Vogt,A., Kirtland Turner,S., North,S.H.  
692 and Nakai,H. (2014) Stringent response processes suppress DNA damage  
693 sensitivity caused by deficiency in full-length translation initiation factor 2  
694 or PriA helicase. *Mol. Microbiol.*, **92**, 28–46.
- 695 21. Mechulam,Y., Blanquet,S. and Schmitt,E. (2013) Translation Initiation.  
696 *EcoSal Plus*, **4**, doi: 10.1128/ecosalplus.4.2.2.
- 697 22. Lee,J.H., Choi,S.K., Roll-Mecak,A., Burley,S.K. and Dever,T.E. (1999)  
698 Universal conservation in translation initiation revealed by human and  
699 archaeal homologs of bacterial translation initiation factor IF2. *Proc. Natl.*  
700 *Acad. Sci. U. S. A.*, **96**, 4342–4347.
- 701 23. Howe,J.G. and Hershey,J.W.B. (1984) The rate of evolutionary divergence of  
702 initiation factors IF2 and IF3 in various bacterial species determined  
703 quantitatively by immunoblotting. *Arch. Microbiol.*, **140**,187-192.
- 704 24. Gaur,R., Grasso,D., Datta,P.P., Krishna,P.D.V., Das,G., Spencer,A.,  
705 Agrawal,R.K., Spremulli,L. and Varshney,U. (2008) A single mammalian  
706 mitochondrial translation initiation factor functionally replaces two bacterial  
707 factors. *Mol. Cell*, **29**, 180–190.
- 708 25. Plumbridge,J.A., Deville,F., Sacerdot,C., Petersen,H.U., Cenatiempo,Y.,  
709 Cozzone,A., Grunberg-Manago,M. and Hershey,J.W. (1985) Two  
710 translational initiation sites in the *infB* gene are used to express initiation  
711 factor IF2 alpha and IF2 beta in *Escherichia coli*. *EMBO J.*, **4**, 223–229.
- 712 26. Nyengaard,N.R., Mortensen,K.K., Lassen,S.F., Hershey,J.W.B. and Sperling-  
713 Petersen,H.U. (1991) Tandem translation of *E.coli* initiation factor IF2 $\beta$ :  
714 Purification and characterization in vitro of two active forms. *Biochem.*  
715 *Biophys. Res. Commun.*, **181**, 1572–1579.
- 716 27. Laalami,S., Putzer,H., Plumbridge,J.A. and Grunberg-Manago,M. (1991) A  
717 severely truncated form of translational initiation factor 2 supports growth  
718 of *Escherichia coli*. *J. Mol. Biol.*, **220**, 335–349.
- 719 28. Sacerdot,C., Vachon,G., Laalami,S., Morel-Deville,F., Cenatiempo,Y. and  
720 Grunberg-Manago,M. (1992) Both forms of translational initiation factor IF2  
721 ( $\alpha$  and  $\beta$ ) are required for maximal growth of *Escherichia coli*. Evidence for  
722 two translational initiation codons for IF2 $\beta$ . *J. Mol. Biol.*, **225**, 67–80.

- 723 29. Vachon,G., Ringeaud,J., Dérijard,B., Julien,R. and Cenatiempo,Y. (1993)  
724 Domain of *E. coli* translational initiation factor IF2 homologous to lambda *ci*  
725 repressor and displaying DNA binding activity. *FEBS Lett.*, **321**, 241–246.
- 726 30. Miller,J.H. (1992) A Short Course in Bacterial Genetics: A Laboratory Manual  
727 and Handbook for *Escherichia coli* and Related Bacteria. Cold Spring Harbor  
728 Lab Press, New York.
- 729 31. Anupama,K., Leela,J.K. and Gowrishankar,J. (2011) Two pathways for  
730 RNase E action in *Escherichia coli in vivo* and bypass of its essentiality in  
731 mutants defective for Rho-dependent transcription termination. *Mol.*  
732 *Microbiol.*, **82**, 1330–1348.
- 733 32. Baba,T., Ara,T., Hasegawa,M., Takai,Y., Okumura,Y., Baba,M.,  
734 Datsenko,K.A., Tomita,M., Wanner,B.L. and Mori,H. (2006) Construction of  
735 *Escherichia coli* K-12 in-frame, single-gene knockout mutants: The Keio  
736 collection. *Mol. Syst. Biol.*, **2**, 2006.0008.
- 737 33. Bolivar,F., Rodriguez,R.L., Greene,P.J., Betlach,M.C., Heyneker,H.L.,  
738 Boyer,H.W., Crosa,J.H. and Falkow,S. (1977) Construction and  
739 characterization of new cloning vehicle. II. A multipurpose cloning system.  
740 *Gene*, **2**, 95–113.
- 741 34. Chang,A.C.Y. and Cohen,S.N. (1978) Construction and characterization of  
742 amplifiable multicopy DNA cloning vehicles derived from the P15A cryptic  
743 miniplasmid. *J. Bacteriol.*, **134**, 1141–1156.
- 744 35. Lerner,C.G. and Inouye,M. (1990) Low copy number plasmids for regulated  
745 low-level expression of cloned genes in *Escherichia coli* with blue/white  
746 insert screening capability. *Nucleic Acids Res.*, **18**, 4631.
- 747 36. Andrews,A.E., Lawley,B. and Pittard,A.J. (1991) Mutational analysis of  
748 repression and activation of the *tyrP* gene in *Escherichia coli*. *J. Bacteriol.*,  
749 **173**, 5068–5078.
- 750 37. Leela,J.K., Syeda,A.H., Anupama,K. and Gowrishankar,J. (2013) Rho-  
751 dependent transcription termination is essential to prevent excessive  
752 genome-wide R-loops in *Escherichia coli*. *Proc. Natl. Acad. Sci. U. S. A.*, **110**,  
753 258–263.
- 754 38. Amann,E., Ochs,B. and Abel,K.J. (1988) Tightly regulated *tac* promoter  
755 vectors useful for the expression of unfused and fused proteins in  
756 *Escherichia coli*. *Gene*, **69**, 301–315.
- 757 39. Datsenko,K.A. and Wanner,B.L. (2000) One-step inactivation of  
758 chromosomal genes in *Escherichia coli* K-12 using PCR products. *Proc. Natl.*  
759 *Acad. Sci. U. S. A.*, **97**, 6640–6645.
- 760 40. Sivaramakrishnan,P., Sepúlveda,L.A., Halliday,J.A., Liu,J., Núñez,M.A.B.,

- 761 Golding, I., Rosenberg, S.M. and Herman, C. (2017) The transcription fidelity  
762 factor GreA impedes DNA break repair. *Nature*, **550**, 214–218.
- 763 41. Raghunathan, N., Goswami, S., Leela, J.K., Pandiyan, A. and Gowrishankar, J.  
764 (2019) A new role for *Escherichia coli* Dam DNA methylase in prevention of  
765 aberrant chromosomal replication. *Nucleic Acids Res.*, **47**, 5698–5711.
- 766 42. Gowrishankar, J. (1985) Identification of osmoreponsive genes in  
767 *Escherichia coli*: Evidence for participation of potassium and proline  
768 transport systems in osmoregulation. *J. Bacteriol.*, **164**, 434–445.
- 769 43. Raghunathan, N., Kapshikar, R.M., Leela, J.K., Mallikarjun, J., Bouloc, P. and  
770 Gowrishankar, J. (2018) Genome-wide relationship between R-loop  
771 formation and antisense transcription in *Escherichia coli*. *Nucleic Acids Res.*,  
772 **46**, 3400–3411.
- 773 44. Azeroglu, B., Mawer, J.S.P., Cockram, C.A., White, M.A., Hasan, A.M.M.,  
774 Filatenkova, M. and Leach, D.R.F. (2016) RecG directs DNA synthesis during  
775 double-strand break repair. *PLoS Genet.*, **12**, e1005799.
- 776 45. White, M.A., Azeroglu, B., Lopez-Vernaza, M.A., Hasan, A.M.M. and  
777 Leach, D.R.F. (2018) RecBCD coordinates repair of two ends at a DNA  
778 double-strand break, preventing aberrant chromosome amplification.  
779 *Nucleic Acids Res.*, **46**, 6670–6682.
- 780 46. Sambrook, J. and Russell, D. (2001) *Molecular Cloning: A Laboratory Manual*  
781 3rd edn. Cold Spring Harbor Lab Press, New York.
- 782 47. Ali, N. and Gowrishankar, J. (2020) Cross-subunit catalysis and a new  
783 phenomenon of recessive resurrection in *Escherichia coli* RNase E. *Nucleic*  
784 *Acids Res.*, **48**, 847–861.
- 785 48. Boyd, D., Weiss, D.S., Chen, J.C. and Beckwith, J. (2000) Towards single-copy  
786 gene expression systems making gene cloning physiologically relevant:  
787 Lambda InCh, a simple *Escherichia coli* plasmid-chromosome shuttle  
788 system. *J. Bacteriol.*, **182**, 842–847.
- 789 49. Konrad, E.B. (1977) Method for the isolation of *Escherichia coli* mutants with  
790 enhanced recombination between chromosomal duplications. *J. Bacteriol.*,  
791 **130**, 167–172.
- 792 50. Lovett, S.T., Hurley, R.L., Sutter, V.A., Aubuchon, R.H. and Lebedeva, M.A.  
793 (2002) Crossing over between regions of limited homology in *Escherichia coli*:  
794 RecA-dependent and RecA-independent pathways. *Genetics*, **160**, 851–859.
- 795 51. Dutra, B.E., Sutter, V.A. and Lovett, S.T. (2007) RecA-independent  
796 recombination is efficient but limited by exonucleases. *Proc. Natl. Acad. Sci.*  
797 *U. S. A.*, **104**, 216–221.

- 798 52. Lo´pez-Amoro´s,R., Comas,J. and Vives-Rego,J. (1995) Flow cytometric  
799 assessment of *Escherichia coli* and *Salmonella typhimurium* starvation  
800 survival in seawater using rhodamine 123, propidium iodide, and oxonol.  
801 *Appl. Environ. Microbiol.*, **61**, 2521-2526
- 802 53. Grylak-Mielnicka,A., Bidnenko,V., Bardowski,J. and Bidnenko,E. (2016)  
803 Transcription termination factor Rho: a hub linking diverse physiological  
804 processes in bacteria. *Microbiology*,**162**, 433-447.
- 805 54. Adhya,S. and Gottesman,M. (1978) Control of transcription termination.  
806 *Annu. Rev. Biochem.*, **47**, 967-996.
- 807 55. Gowrishankar,J. and Harinarayanan,R. (2004) Why is transcription coupled  
808 to translation in bacteria? *Mol. Microbiol.*, **54**, 598-603.
- 809 56. Peters,J.M., Mooney,R.A., Grass,J.A., Jessen,E.D., Tran,F. and Landick,R.  
810 (2012) Rho and NusG suppress pervasive antisense transcription in  
811 *Escherichia coli*. *Genes Dev.*, **26**, 2621-2633.
- 812 57. Harinarayanan,R. and Gowrishankar,J. (2003) Host factor titration by  
813 chromosomal R-loops as a mechanism for runaway plasmid replication in  
814 transcription termination-defective mutants of *Escherichia coli*. *J. Mol. Biol.*,  
815 **332**, 31-46.
- 816 58. Gowrishankar,J., Krishna Leela,J. and Anupama,K. (2013) R-loops in  
817 bacterial transcription: Their causes and consequences. *Transcription*, **4**,  
818 153-157.
- 819 59. Washburn,R.S. and Gottesman,M.E. (2011) Transcription termination  
820 maintains chromosome integrity. *Proc. Natl. Acad. Sci. U. S. A.*, **108**, 792-  
821 797.
- 822 60. Johnson,D.B.F., Wang,C., Xu,J., Schultz,M.D., Schmitz,R.J., Ecker,J.R. and  
823 Wang,L. (2012) Release factor one is nonessential in *Escherichia coli*. *ACS*  
824 *Chem. Biol.*, **7**, 1337-1344.
- 825 61. Hu,K. and Artsimovitch,I. (2017) A screen for *rfaH* suppressors reveals a key  
826 role for a connector region of termination factor Rho. *mBio*, **8**, e00753-17.
- 827 62. Brandi,A., Piersimoni,L., Feto,N.A., Spurio,R., Alix,J.H., Schmidt,F. and  
828 Gualerzi,C.O. (2019) Translation initiation factor IF2 contributes to ribosome  
829 assembly and maturation during cold adaptation. *Nucleic Acids Res.*, **47**,  
830 4652-4662.
- 831 63. Xia,J., Chen,L.T., Mei,Q., Ma,C.H., Halliday,J.A., Lin,H.Y., Magnan,D.,  
832 Pribis,J.P., Fitzgerald,D.M., Hamilton,H.M., *et al.* (2016) Holliday junction  
833 trap shows how cells use recombination and a junction-guardian role of  
834 RecQ helicase. *Sci. Adv.*, **2**, e1601605.

- 835 64. Boguslawski,S.J., Smith,D.E., Michalak,M.A., Mickelson,K.E., Yehle,C.O.,  
836 Patterson,W.L. and Carrico,R.J. (1986) Characterization of monoclonal  
837 antibody to DNA · RNA and its application to immunodetection of hybrids. *J.*  
838 *Immunol. Methods*, **89**, 123–130.
- 839 65. McGlynn,P. and Lloyd,R.G. (2000) Modulation of RNA polymerase by  
840 (p)ppGpp reveals a RecG-dependent mechanism for replication fork  
841 progression. *Cell*, **101**, 35–45.
- 842 66. Trautinger,B.W., Jaktaji,R.P., Rusakova,E. and Lloyd,R.G. (2005) RNA  
843 polymerase modulators and DNA repair activities resolve conflicts between  
844 DNA replication and transcription. *Mol. Cell*, **19**, 247–258.
- 845 67. Kamarthapu,V., Epshtein,V., Benjamin,B., Proshkin,S., Mironov,A.,  
846 Cashel,M. and Nudler,E. (2016) ppGpp couples transcription to DNA repair  
847 in *E. coli*. *Science*, **352**, 993–996.
- 848 68. Carles-Kinch,K., George,J.W. and Kreuzer,K.N. (1997) Bacteriophage T4  
849 UvsW protein is a helicase involved in recombination, repair and the  
850 regulation of DNA replication origins. *EMBO J.*, **16**, 4142–4151.
- 851 69. Dudas,K.C. and Kreuzer,K.N. (2001) UvsW protein regulates bacteriophage  
852 T4 origin-dependent replication by unwinding R-loops. *Mol. Cell. Biol.*, **21**,  
853 2706–2715.
- 854 70. Magner,D.B., Blankschien,M.D., Lee,J.A., Pennington,J.M., Lupski,J.R.R.  
855 and Rosenberg,S.M. (2007) RecQ promotes toxic recombination in cells  
856 lacking recombination intermediate-removal proteins. *Mol. Cell*, **26**, 273–  
857 286.
- 858 71. Zhang,J., Mahdi,A.A., Briggs,G.S. and Lloyd,R.G. (2010) Promoting and  
859 avoiding recombination: Contrasting activities of the *Escherichia coli*  
860 RuvABC Holliday junction resolvase and RecG DNA translocase. *Genetics*,  
861 **185**, 23–37.
- 862 72. Florés,M.J., Sanchez,N. and Michel,B. (2005) A fork-clearing role for UvrD.  
863 *Mol. Microbiol.*, **57**, 1664–1675.
- 864 73. Capaldo,F.N. and Barbour,S.D. (1975) DNA content, synthesis and integrity  
865 in dividing and non-dividing cells of Rec<sup>-</sup> strains of *Escherichia coli* K12. *J.*  
866 *Mol. Biol.*, **91**, 53–66.
- 867 74. Miller,J.E. and Barbour,S.D. (1977) Metabolic characterization of the viable,  
868 residually dividing and nondividing cell classes of recombination deficient  
869 strains of *Escherichia coli*. *J. Bacteriol.*, **130**, 160–166.
- 870 75. Khodursky,A.B. and Cozzarelli,N.R. (1998) The mechanism of inhibition of  
871 topoisomerase IV by quinolone antibacterials. *J. Biol. Chem.*, **273**, 27668–  
872 27677.

- 873 76. Potrykus,K., Vinella,D., Murphy,H., Szalewska-Palasz,A., D’Ari,R. and  
874 Cashel,M. (2006) Antagonistic regulation of *Escherichia coli* ribosomal RNA  
875 *rnnB* P1 promoter activity by GreA and DksA. *J. Biol. Chem.*, **281**, 15238–  
876 15248.
- 877 77. Vinella,D., Potrykus,K., Murphy,H. and Cashel,M. (2012) Effects on growth  
878 by changes of the balance between GreA, GreB, and DksA suggest mutual  
879 competition and functional redundancy in *Escherichia coli*. *J. Bacteriol.*, **194**,  
880 261–273.
- 881 78. Gowrishankar,J. (2015) End of the beginning: Elongation and termination  
882 features of alternative modes of chromosomal replication initiation in  
883 bacteria. *PLoS Genet.*, **11**, e1004909.
- 884 79. Niu,Y., Tenney,K., Li,H. and Gimble,F.S. (2008) Engineering variants of the  
885 I-SceI homing endonuclease with strand-specific and site-specific DNA-  
886 nicking activity. *J. Mol. Biol.*, **382**, 188–202.
- 887 80. Laban,A. and Cohen,A. (1981) Interplasmidic and intraplasmidic  
888 recombination in *Escherichia coli* K-12. *Mol. Gen. Genet.*, **184**, 200–207.
- 889 81. Cohen,A. and Laban,A. (1983) Plasmidic recombination in *Escherichia coli* K-  
890 12: The role of *recF* gene function. *Mol. Gen. Genet.*, **189**, 471–474.
- 891 82. Zhang,G., Deng,E., Baugh,L. and Kushner,S.R. (1998) Identification and  
892 characterization of *Escherichia coli* DNA helicase II mutants that exhibit  
893 increased unwinding efficiency. *J. Bacteriol.*, **180**, 377–387.
- 894 83. Veaute,X., Delmas,S., Selva,M., Jeusset,J., Le Cam,E., Matic,I., Fabre,F. and  
895 Petit,M.A. (2005) UvrD helicase, unlike Rep helicase, dismantles RecA  
896 nucleoprotein filaments in *Escherichia coli*. *EMBO J.*, **24**, 180–189.
- 897 84. Nazir,A. and Harinarayanan,R. (2016) Inactivation of cell division protein  
898 FtsZ by SulA makes Lon indispensable for the viability of a ppGpp<sup>0</sup> strain of  
899 *Escherichia coli*. *J. Bacteriol.*, **198**, 688–700.
- 900 85. Ouyang,J., Yadav,T., Zhang,J.M., Yang,H., Rheinbay,E., Guo,H., Haber,D.A.,  
901 Lan,L. and Zou,L. (2021) RNA transcripts stimulate homologous  
902 recombination by forming DR-loops. *Nature*, **594**, 283–288.
- 903 86. Lesterlin,C., Ball,G., Schermelleh,L. and Sherratt,D.J. (2014) RecA bundles  
904 mediate homology pairing between distant sisters during DNA break repair.  
905 *Nature*, **506**, 249–253.
- 906 87. Centore,R.C. and Sandler,S.J. (2007) UvrD limits the number and intensities  
907 of RecA-green fluorescent protein structures in *Escherichia coli* K-12. *J.*  
908 *Bacteriol.*, **189**, 2915–2920.
- 909 88. Meddows,T.R., Savory,A.P., Grove,J.I., Moore,T. and Lloyd,R.G. (2005) RecN

- 910 protein and transcription factor DksA combine to promote faithful  
911 recombinational repair of DNA double-strand breaks. *Mol. Microbiol.*, **57**, 97–  
912 110.
- 913 89. Vickridge,E., Planchenault,C., Cockram,C., Junceda,I.G. and Espéli,O.  
914 (2017) Management of *E. coli* sister chromatid cohesion in response to  
915 genotoxic stress. *Nat. Commun.*, **8**, 14618.
- 916 90. Keyamura,K., Sakaguchi,C., Kubota,Y., Hironori,N. and Hishida,T. (2013)  
917 RecA protein recruits structural maintenance of chromosomes (SMC)-like  
918 RecN protein to DNA double-strand breaks. *J. Biol. Chem.*, **288**, 29229-  
919 29237.
- 920 91. Helleday,T., Lo,J., van Gent,D.C. and Engelward,B.P. (2007) DNA double-  
921 strand break repair: From mechanistic understanding to cancer treatment.  
922 *DNA Repair*, **6**, 923–935.
- 923 92. Chiruvella,K.K., Liang,Z. and Wilson,T.E. (2013) Repair of double-strand  
924 breaks by end joining. *Cold Spring Harb. Perspect. Biol.*, **5**, a012757.
- 925 93. Balestrini,A., Ristic,D., Dionne,I., Liu,X.Z., Wyman,C., Wellinger,R.J. and  
926 Petrini,J.H.J. (2013) The Ku heterodimer and the metabolism of single-ended  
927 DNA double-strand breaks. *Cell Rep.*, **3**, 2033-2045.
- 928 94. Ensminger,M. and Löbrich,M. (2020) One end to rule them all: Non-  
929 homologous end-joining and homologous recombination at DNA double-  
930 strand breaks. *Br. J. Radiol.*, **93**, 20191054.
- 931 95. Pham,N., Yan,Z., Yu,Y., Faria Afreen,M., Malkova,A., Haber,J.E. and Ira,G.  
932 (2021) Mechanisms restraining break-induced replication at two-ended DNA  
933 double-strand breaks. *EMBO J.*, **40**, e104847.
- 934 96. Badrinarayanan,A., Le,T.B.K., Spille,J.H., Cisse,I.I. and Laub,M.T. (2017)  
935 Global analysis of double-strand break processing reveals *in vivo* properties  
936 of the helicase-nuclease complex AddAB. *PLoS Genet.*, **13**, e1006783.
- 937 97. Kowalczykowski,S.C. (2015) An overview of the molecular mechanisms of  
938 recombinational DNA repair. *Cold Spring Harb. Perspect. Biol.*, **7**, a016410.
- 939 98. Krejci,L., Altmannova,V., Spirek,M. and Zhao,X. (2012) Homologous  
940 recombination and its regulation. *Nucleic Acids Res.*, **40**, 5795–5818.
- 941 99. Cox,M.M. (2007) Regulation of bacterial RecA protein function. *Crit. Rev.*  
942 *Biochem. Mol. Biol.*, **42**, 41–63.
- 943 100. Matic,I., Rayssiguier,C. and Radman,M. (1995) Interspecies gene exchange  
944 in bacteria: The role of SOS and mismatch repair systems in evolution of  
945 species. *Cell*, **80**, 507-515.

- 946 101. Renzette,N., Gumlaw,N. and Sandler,S.J. (2007) DinI and RecX modulate  
947 RecA-DNA structures in *Escherichia coli* K-12.*Mol. Microbiol.*, **63**, 103-115.
- 948 102. Cohen,S.E., Lewis,C.A., Mooney,R.A., Kohanski,M.A., Collins,J.J.,  
949 Landick,R. and Walker,G.C. (2010) Roles for the transcription elongation  
950 factor NusA in both DNA repair and damage tolerance pathways in  
951 *Escherichia coli*. *Proc. Natl. Acad. Sci. U. S. A.*, **107**, 15517–15522.
- 952 103. Cohen,S.E. and Walker,G.C. (2010) The transcription elongation factor  
953 NusA is required for stress-induced mutagenesis in *Escherichia coli*. *Curr.*  
954 *Biol.*, **20**, 80–85.
- 955 104. Epshtein,V., Kamarthapu,V., McGary,K., Svetlov,V., Ueberheide,B.,  
956 Proshkin,S., Mironov,A. and Nudler,E. (2014) UvrD facilitates DNA repair by  
957 pulling RNA polymerase backwards. *Nature*, **505**, 372–377.
- 958 105. Shazand,K., Tucker,J., Chiang,R., Stansmore,K., Sperling-Petersen,H.U.,  
959 Grunberg-Manago,M., Rabinowitz,J.C. and Leighton,T. (1990) Isolation and  
960 molecular genetic characterization of the *Bacillus subtilis* gene (*infB*)  
961 encoding protein synthesis initiation factor 2. *J. Bacteriol.*, **172**, 2675–2687.
- 962



963

## Legends to figures

964 **Figure 1:** Synthetic lethality of *rho ruv* and of *uvrD ruv* mutants, and their  
965 suppression by loss of IF2-1 or by *rec* mutations. Unless otherwise indicated,  
966 designations *rho* and *ruv* that are not further qualified refer to alleles *rho-136<sup>opal</sup>*  
967 and  $\Delta ruvABC::Cm$ , respectively. All strain numbers mentioned are prefixed with  
968 GJ. (A) Blue-white screening assays, on defined medium at 30°, for strains  
969 carrying *rho<sup>+</sup> infB<sup>+</sup>* shelter plasmid pHYD5212. Representative images are shown;  
970 for each of the sub-panels, relevant chromosomal genotypes/features are given  
971 on top while the numbers beneath indicate the percentage of white colonies to  
972 total (minimum of 500 colonies counted). Examples of white colonies are marked  
973 by yellow arrows. Growth medium for sub-panels vii, viii, and xi was  
974 supplemented with IPTG. Strains employed for the different sub-panels were  
975 pHYD5212 derivatives of: i, 15441; ii, 15447; iii, 15446; iv, 15498; v, 15500; vi,  
976 15499; vii, 15458; viii, 15457; ix, 19134; x, 19131; and xi, 19132. (B) Dilution-  
977 spotting assay, on minimal A supplemented with Glu or Ara as indicated, of *rho-*  
978 *136<sup>opal</sup>* strains bearing  $P_{ara-rho^+}$ ; other relevant genotypes/features are shown at  
979 left. Strains for different rows were (from top): 1, 19379; 2, 19380; 3, 19381 (this  
980 strain was grown in Ara-supplemented medium before dilutions were spotted);  
981 and 4, 19382. (C) Blue-white screening assays to determine whether *rec* or *lexA3*  
982 mutations suppress *rho ruv* synthetic lethality. Methods used, and notations, are  
983 similar to those in panel A. A  $\Delta ruvA$  allele was used for sub-panel vi. Strains  
984 employed were pHYD5212 derivatives of: i, 15460; ii, 15471; iii, 15491; iv,  
985 15487; v, 15497; and vi, 15485. (D) Dilution-spotting assay, on LB medium  
986 without (-) and with (+) Dox supplementation, of RDG-bearing derivatives whose  
987 relevant genotypes/features are indicated at left; strains on all but the top two  
988 rows were also  $\Delta infB$ . Strains employed for different rows were (from top): 1,  
989 19127; 2, 19161; 3, 19801; 4, 19802; 5, 19803; 6, 19843; and 7, 19835.

990 **Figure 2:** Loss of IF2-1 is associated with sensitivity to two-ended DSBs in DNA.  
991 In all panels, strains designated  $\Delta Nil$ ,  $\Delta 1$ , or  $\Delta 2,3$  were also  $\Delta infB$ , as too was the  
992 *recA* strain in panel B. (A-B) Dilution-spotting assays, on LB medium with

993 supplements as indicated on top (Phleo and Bleo each at 0.5  $\mu\text{g}/\text{ml}$ , Glu and Ara  
994 each at 0.2%), of different strains whose relevant genotypes/features are  
995 marked. (C) Flow cytometry following propidium iodide staining of cells in LB-  
996 grown cultures of strains whose relevant genotypes/features are indicated on  
997 top and perturbations, if any, at left; Phleo supplementation was at 2  $\mu\text{g}/\text{ml}$ , and  
998 I-SceI refers to Ara-supplementation in cultures of derivatives carrying  $P_{ara}::\text{I-}$   
999  $\text{SceI}$  and the cognate cut site in *lacZ*. In each sub-panel, the percentage of total  
1000 cells whose intensity of propidium iodide staining exceeded the threshold that  
1001 was taken to demarcate dead cells ( $3 \times 10^3$  arbitrary units, marked by vertical  
1002 line), is indicated at top right. Strains employed across all three panels were (all  
1003 strain numbers mentioned are prefixed with GJ): I. derivatives without  $P_{ara}::\text{I-}$   
1004  $\text{SceI} - \Delta Nil$ , 19193;  $\Delta 2,3$ , 19194;  $\Delta 1$ , 15494; *recA*, 19844; *priB*, 19812; and  
1005 *priA300*, 15495; and II. derivatives with  $P_{ara}::\text{I-SceI} - infB^+$ , 15837;  $\Delta Nil$ , 19804;  
1006  $\Delta 2,3$ , 19805;  $\Delta 1$ , 19806; and *recA*, 19818.

1007 **Figure 3:** Chromosomal DNA copy number analysis by WGS following two-ended  
1008 DSB generation at *lacZ*. DNA copy numbers (after normalization) are plotted as  
1009 semi-log graphs for overlapping 10-kb intervals across the genome for derivatives  
1010 each carrying  $P_{ara}::\text{I-SceI}$  and the cognate cut site in *lacZ*, after supplementation  
1011 of cultures grown in LB with 0.2% Glu (control) or Ara for 1 hr (top and bottom  
1012 rows, respectively). Relevant genotypes/features are indicated within each of the  
1013 panels; all strains were also  $\Delta infB$ . In these Cartesian graphical representations,  
1014 the circular 4642-kb long chromosome is shown linearized at *oriC*, with genome  
1015 coordinates on the abscissa corresponding to the MG1655 reference sequence  
1016 (wherein *oriC* is at 3926 kb). Ordinate scales ( $\log_2$ ) shown at left on top and  
1017 bottom rows are common for, respectively, panels i-iv and v-vii. The positions of  
1018 *lacZ*, *TerA* and *TerC/B* are marked. Strains used were (all strain numbers  
1019 mentioned are prefixed with GJ):  $\Delta Nil$ , 19804;  $\Delta 2,3$ , 19805;  $\Delta 1$ , 19806; and *recA*,  
1020 19818.

1021 **Figure 4:** Effect of IF2 isoforms on HR. Recombination frequency data are given  
1022 for strains with the indicated genotypes/features in the Konrad (A), inter-plasmid

1023 recombination (B), and P1 transduction (C) assays, after normalization to the  
1024 value for the cognate control strain (taken as 1, and shown at extreme left for  
1025 each panel); the actual control strain values were  $2.8 \times 10^{-7}$ /viable cell,  
1026  $6 \times 10^{-4}$ /viable cell, and  $1.5 \times 10^{-5}$ /phage, respectively. In panels A and B, values  
1027 from every individual experiment is shown, and median values are given beside  
1028 the denoted horizontal lines. Panel C depicts the mean value (given alongside  
1029 each bar) and standard error for each strain. In all panels, strains whose  
1030 designations include  $\Delta Nil$ ,  $\Delta 1$ , or  $\Delta 2,3$  were also  $\Delta infB$ . Strains used were (from  
1031 left, all strain numbers mentioned are prefixed with GJ unless otherwise  
1032 indicated): in panel A, SK707, 19171, 19186, 19162, 19184, and 19165; in panel  
1033 B, 19197, 19196, 19195, and 19847; and in panel C, 19193, 19194, and 15494.

Fig. 1

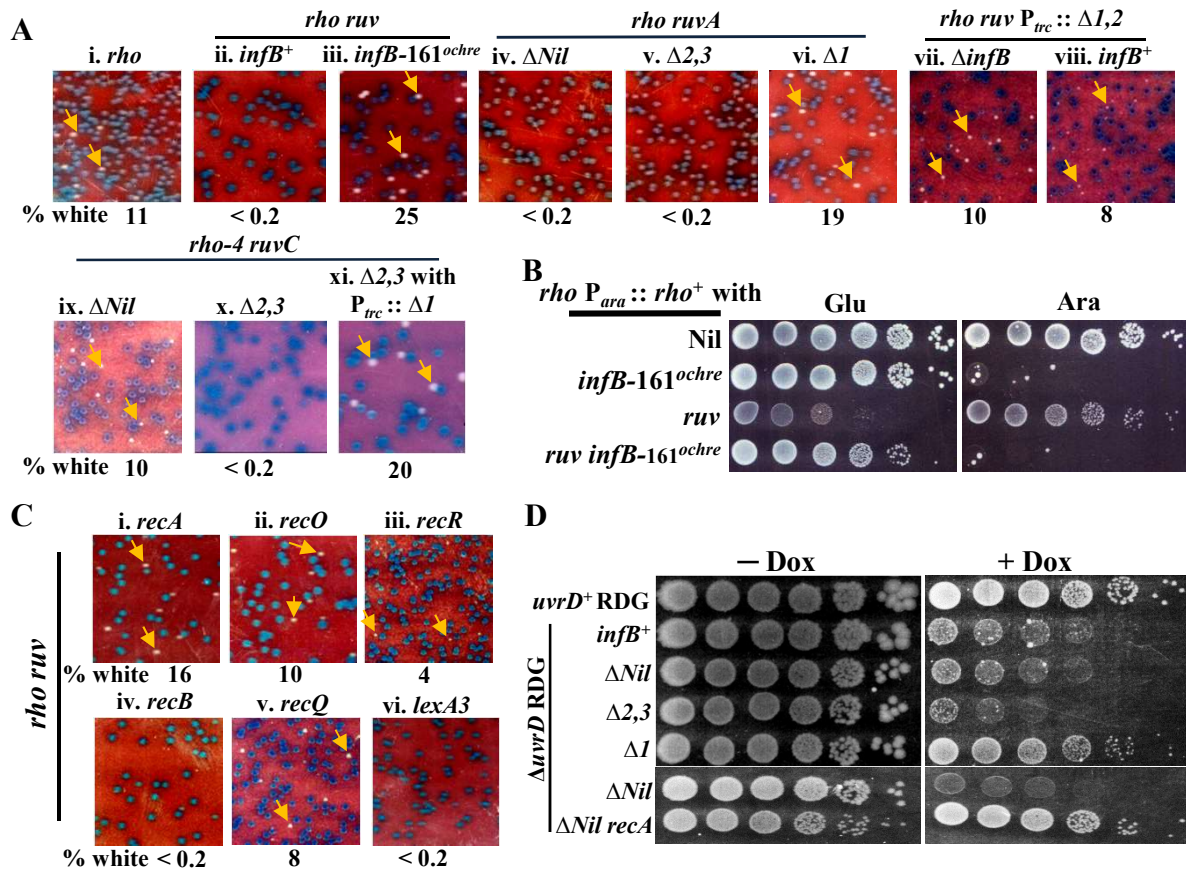

**Figure 1:** Synthetic lethality of *rho ruv* and of *uvrD ruv* mutants, and their suppression by loss of IF2-1 or by *rec* mutations. Unless otherwise indicated, designations *rho* and *ruv* that are not further qualified refer to alleles *rho-136<sup>opal</sup>* and *ΔruvABC::Cm*, respectively. All strain numbers mentioned are prefixed with GJ. (A) Blue-white screening assays, on defined medium at 30°, for strains carrying *rho*<sup>+</sup> *infB*<sup>+</sup> shelter plasmid pHYD5212. Representative images are shown; for each of the sub-panels, relevant chromosomal genotypes/features are given on top while the numbers beneath indicate the percentage of white colonies to total (minimum of 500 colonies counted). Examples of white colonies are marked by yellow arrows. Growth medium for sub-panels vii, viii, and xi was supplemented with IPTG. Strains employed for the different sub-panels were pHYD5212 derivatives of: i, 15441; ii, 15447; iii, 15446; iv, 15498; v, 15500; vi, 15499; vii, 15458; viii, 15457; ix, 19134; x, 19131; and xi, 19132. (B) Dilution-spotting assay, on minimal A supplemented with Glu or Ara as indicated, of *rho-136<sup>opal</sup>* strains bearing *P<sub>ara</sub>-rho*<sup>+</sup>; other relevant genotypes/features are shown at left. Strains for different rows were (from top): 1, 19379; 2, 19380; 3, 19381 (this strain was grown in Ara-supplemented medium before dilutions were spotted); and 4, 19382. (C) Blue-white screening assays to determine whether *rec* or *lexA3* mutations suppress *rho ruv* synthetic lethality. Methods used, and notations, are similar to those in panel A. A *ΔruvA* allele was used for sub-panel vi. Strains employed were pHYD5212 derivatives of: i, 15460; ii, 15471; iii, 15491; iv, 15487; v, 15497; and vi, 15485. (D) Dilution-spotting assay, on LB medium without (–) and with (+) Dox supplementation, of RDG-bearing derivatives whose relevant genotypes/features are indicated at left; strains on all but the top two rows were also *ΔinfB*. Strains employed for different rows were (from top): 1, 19127; 2, 19161; 3, 19801; 4, 19802; 5, 19803; 6, 19843; and 7, 19835.

Fig. 2

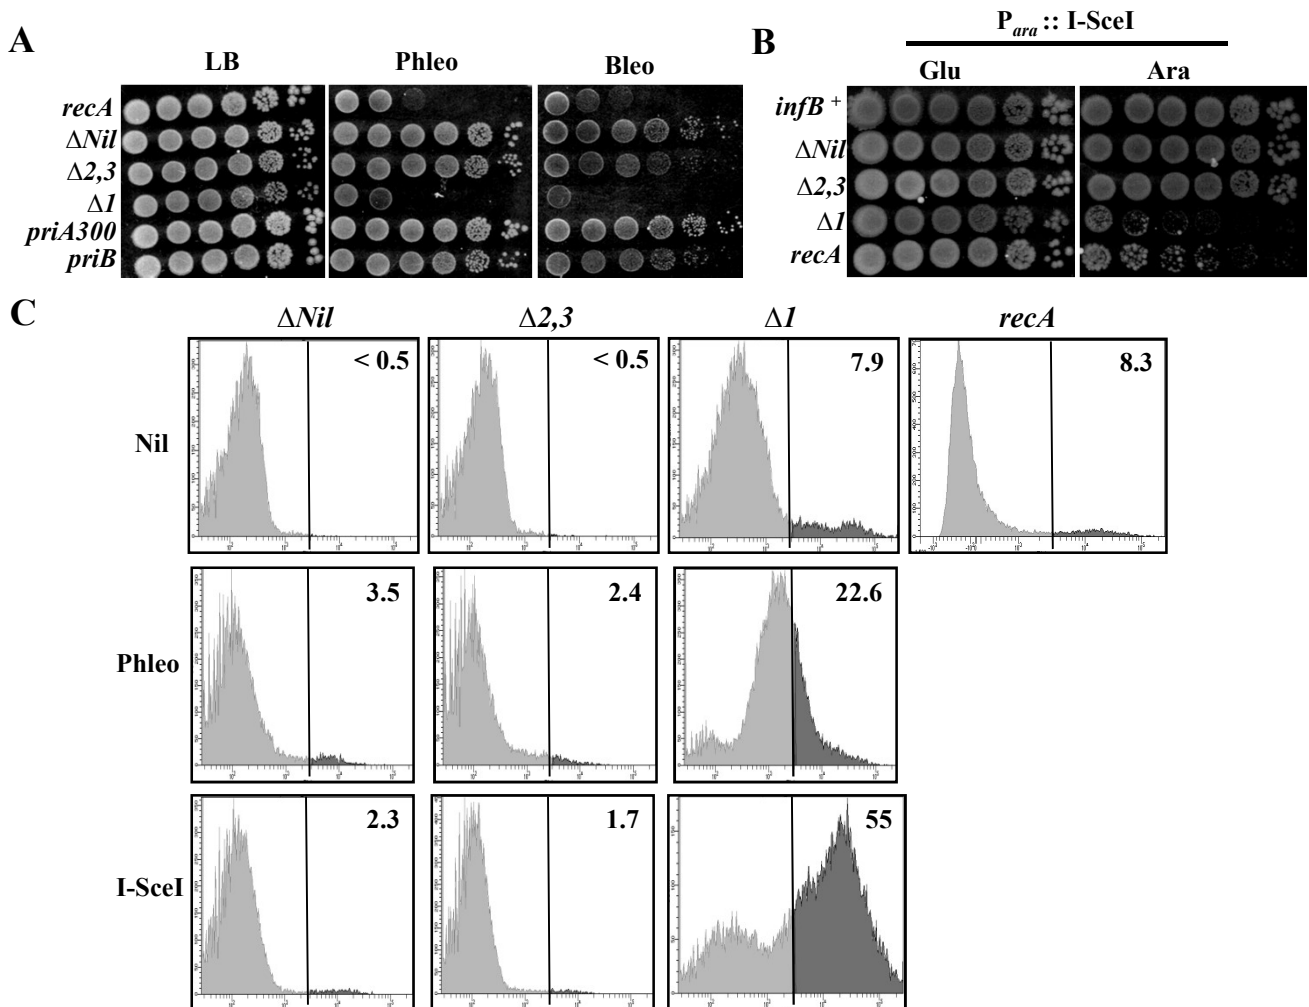

**Figure 2:** Loss of IF2-1 is associated with sensitivity to two-ended DSBs in DNA. In all panels, strains designated  $\Delta Nil$ ,  $\Delta I$ , or  $\Delta 2,3$  were also  $\Delta infB$ , as too was the *recA* strain in panel B. (A-B) Dilution-spotting assays, on LB medium with supplements as indicated on top (Phleo and Bleo each at 0.5  $\mu\text{g}/\text{ml}$ , Glu and Ara each at 0.2%), of different strains whose relevant genotypes/features are marked. (C) Flow cytometry following propidium iodide staining of cells in LB-grown cultures of strains whose relevant genotypes/features are indicated on top and perturbations, if any, at left; Phleo supplementation was at 2  $\mu\text{g}/\text{ml}$ , and I-SceI refers to Ara-supplementation in cultures of derivatives carrying  $P_{ara}::I-SceI$  and the cognate cut site in *lacZ*. In each sub-panel, the percentage of total cells whose intensity of propidium iodide staining exceeded the threshold that was taken to demarcate dead cells ( $3 \times 10^3$  arbitrary units, marked by vertical line), is indicated at top right. Strains employed across all three panels were (all strain numbers mentioned are prefixed with GJ): I. derivatives without  $P_{ara}::I-SceI$  –  $\Delta Nil$ , 19193;  $\Delta 2,3$ , 19194;  $\Delta I$ , 15494; *recA*, 19844; *priB*, 19812; and *priA300*, 15495; and II. derivatives with  $P_{ara}::I-SceI$  – *infB*<sup>+</sup>, 15837;  $\Delta Nil$ , 19804;  $\Delta 2,3$ , 19805;  $\Delta I$ , 19806; and *recA*, 19818.

Fig. 3

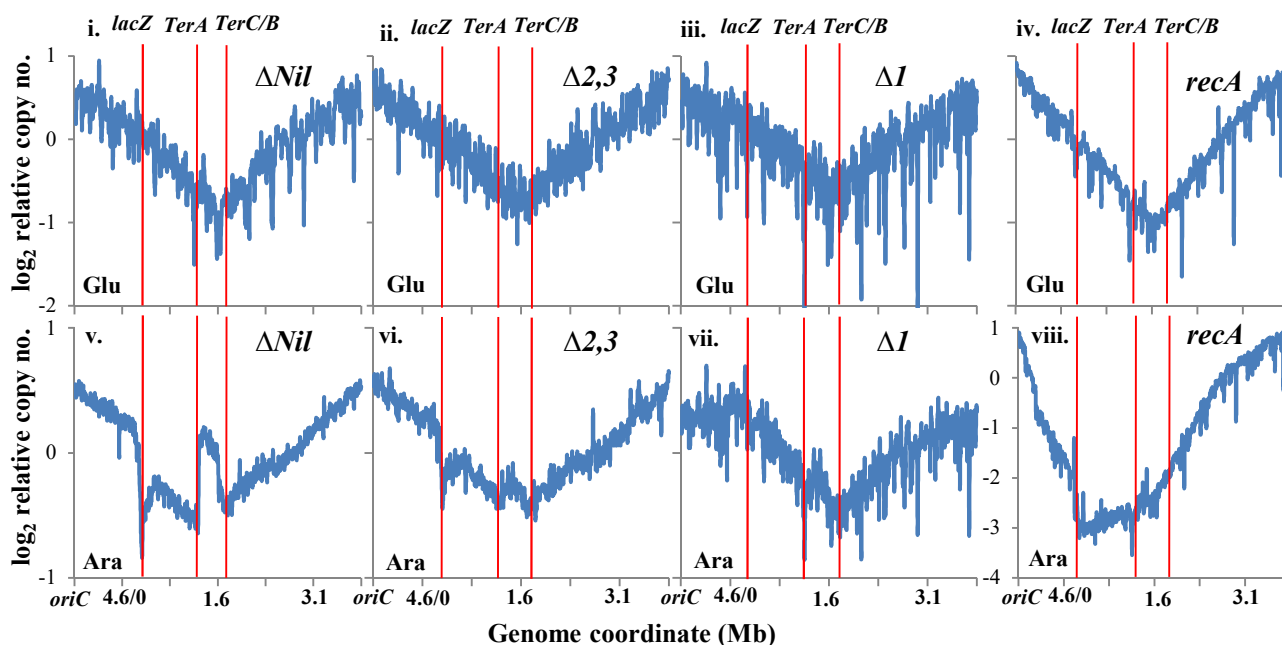

**Figure 3:** Chromosomal DNA copy number analysis by WGS following two-ended DSB generation at *lacZ*. DNA copy numbers (after normalization) are plotted as semi-log graphs for overlapping 10-kb intervals across the genome for derivatives each carrying  $P_{ara}::I$ -SceI and the cognate cut site in *lacZ*, after supplementation of cultures grown in LB with 0.2% Glu (control) or Ara for 1 hr (top and bottom rows, respectively). Relevant genotypes/features are indicated within each of the panels; all strains were also  $\Delta infB$ . In these Cartesian graphical representations, the circular 4642-kb long chromosome is shown linearized at *oriC*, with genome coordinates on the abscissa corresponding to the MG1655 reference sequence (wherein *oriC* is at 3926 kb). Ordinate scales ( $\log_2$ ) shown at left on top and bottom rows are common for, respectively, panels i-iv and v-vii. The positions of *lacZ*, *TerA* and *TerC/B* are marked. Strains used were (all strain numbers mentioned are prefixed with GJ):  $\Delta Nil$ , 19804;  $\Delta 2,3$ , 19805;  $\Delta I$ , 19806; and *recA*, 19818.

Fig. 4

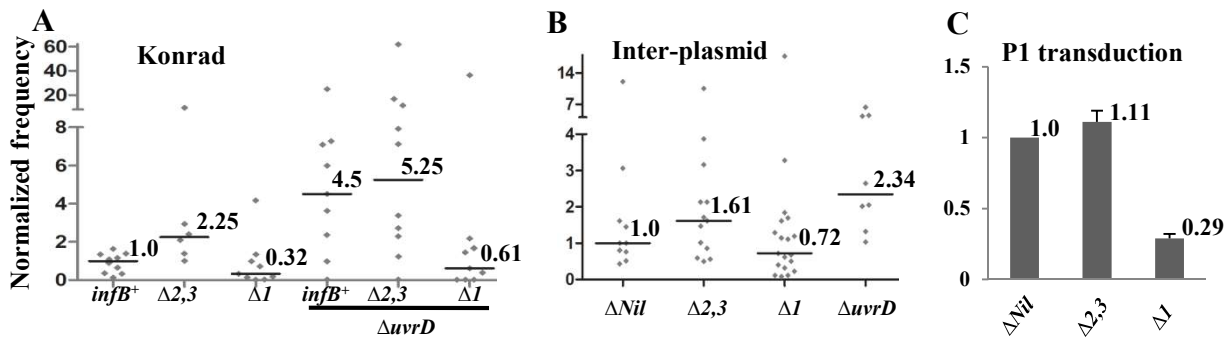

**Figure 4:** Effect of IF2 isoforms on HR. Recombination frequency data are given for strains with the indicated genotypes/features in the Konrad (A), inter-plasmid recombination (B), and P1 transduction (C) assays, after normalization to the value for the cognate control strain (taken as 1, and shown at extreme left for each panel); the actual control strain values were  $2.8 \times 10^{-7}$ /viable cell,  $6 \times 10^{-4}$ /viable cell, and  $1.5 \times 10^{-5}$ /phage, respectively. In panels A and B, values from every individual experiment is shown, and median values are given beside the denoted horizontal lines. Panel C depicts the mean value (given alongside each bar) and standard error for each strain. In all panels, strains whose designations include  $\Delta Nil$ ,  $\Delta I$ , or  $\Delta 2,3$  were also  $\Delta infB$ . Strains used were (from left, all strain numbers mentioned are prefixed with GJ unless otherwise indicated): in panel A, SK707, 19171, 19186, 19162, 19184, and 19165; in panel B, 19197, 19196, 19195, and 19847; and in panel C, 19193, 19194, and 15494.
